SRGP-1/srGAP and AFD-1/Afadin stabilize HMP-1/ $\alpha$ -Catenin at rosettes to seal internalization sites following gastrulation in *C. elegans*

Joel M. Serre<sup>a</sup>, Mark M. Slabodnick<sup>b,c</sup>, Bob Goldstein<sup>b</sup>, and Jeff Hardin<sup>a, d, †</sup>

<sup>a</sup>Program in Genetics and <sup>d</sup>Department of Integrative Biology, University of Wisconsin-Madison

<sup>b</sup>Department of Biology, University of North Carolina at Chapel Hill, Chapel Hill, North Carolina, 27599 USA

<sup>c</sup>Department of Biology, Knox University, Galesburg, Illinois, 61401 USA

<sup>†</sup> Corresponding author:

Department of Integrative Biology, 1117 W. Johnson St., Madison, Wisconsin 53706 USA  
([jddhardin@wisc.edu](mailto:jddhardin@wisc.edu))

Running head: srGAP,  $\alpha$ -catenin, and cell sealing

Keywords: gastrulation, *C. elegans*, cell-cell adhesion, cadherin/catenin complex, afadin, srGAP, rosette

## 1 **Abstract**

2 A hallmark of gastrulation is the establishment of germ layers by internalization of cells initially  
3 on the exterior. In *C. elegans* the end of gastrulation is marked by the closure of the ventral cleft,  
4 a structure formed as cells internalize during gastrulation, and the subsequent rearrangement of  
5 adjacent neuroblasts that remain on the surface. We found that a nonsense allele of *srgp-1/srGAP*  
6 leads to 10-15% cleft closure failure. Deletion of the SRGP-1 C-terminal domain led to a  
7 comparable rate of cleft closure failure, whereas deletion of the N-terminal F-BAR region  
8 resulted in milder defects. Loss of the SRGP-1 C-terminus or F-BAR domain results in defects in  
9 rosette formation and defective clustering of HMP-1/ $\alpha$ -catenin in surface cells during cleft  
10 closure. A mutant form of HMP-1 with an open M domain can suppress cleft closure defects in  
11 *srgp-1* mutant backgrounds, suggesting that this mutation acts as a gain-of-function allele. Since  
12 SRGP-1 binding to HMP-1 is not favored in this case, we sought another HMP-1 interactor that  
13 might be recruited when HMP-1 is constitutively open. A good candidate is AFD-1/Afadin,  
14 which genetically interacts with cadherin-based adhesion later during embryonic elongation.  
15 AFD-1 is prominently expressed at the vertex of neuroblast rosettes in wildtype, and depletion of  
16 AFD-1/Afadin increases cleft closure defects in *srgp-1* and *hmp-1<sup>R551/554A</sup>* backgrounds. We  
17 propose that SRGP-1 promotes nascent junction formation in rosettes; as junctions mature and  
18 sustain higher levels of tension, the M domain of HMP-1 opens, allowing maturing junctions to  
19 transition from recruitment of SRGP-1 to AFD-1. Our work identifies new roles for  $\alpha$ -catenin  
20 interactors during a process crucial to metazoan development.

21 **Introduction**

22 Gastrulation is a hallmark of metazoan development that establishes the basic body plan [1]. In  
23 many organisms, internalization of founder cells that form the three primary germ layers, as well  
24 as primordial germ cells, occurs via detachment of the apical surfaces of individual cells from the  
25 embryo's exterior [2-5]. Such internalization can involve an epithelial-mesenchymal transition  
26 (EMT), as cells dismantle their cell-cell junctional machinery and detach [6, 7]; in other cases, a  
27 true EMT does not occur [5, 8]. Neighboring cells that remain on the exterior must seal the  
28 breach left behind by internalizing cells, rearranging and making new cell-cell junctional  
29 connections as they do so. While cell internalization is essential for successful gastrulation in  
30 numerous organisms, most of the focus thus far has been on cellular events within internalizing  
31 cells; relatively less attention has been paid to neighboring cells that seal the embryonic exterior.

32  
33 The early *C. elegans* embryo is a useful model system for understanding changes in cell-cell  
34 adhesion associated with cell internalization. Gastrulation in *C. elegans* involves stereotypical  
35 events on the ventral surface of the embryo that internalize endodermal, mesodermal, and germ  
36 cell precursors [5, 9]. The best studied of these events is the internalization of Ea and Ep, the  
37 endodermal precursors. Ea/p undergo myosin-mediated apical constriction [8, 10-13]. Germ cell  
38 precursors rely on a different mechanism, involving cadherin-dependent "hitchhiking" [14].  
39 Concomitant with internalization of Ea/p, neighboring cells have been observed to produced  
40 protrusions that may aid resealing of the embryo's surface via active crawling [15]. Together  
41 with apical constriction of internalizing cells themselves, these movements are thought to aid cell  
42 internalization and simultaneous resealing of the ventral surface [12, 15].

43

44 A ventral cleft forms on the surface of the embryo as the last sets of cells are internalized at the  
45 end of gastrulation. The ventral cleft is surrounded by neuroblasts derived from ABplp and  
46 ABprp in the posterior and ABalp and ABarp in the anterior. The ventral gastrulation cleft is  
47 subsequently closed via movements of ventral neuroblasts toward the ventral midline between  
48 230 and 290 minutes postfertilization, causing the ventral cleft to disappear approximately one  
49 hour before the movements of ventral epidermal enclosure begin [16, 17]. Failures in ventral  
50 cleft closure lead to highly penetrant failure of ventral enclosure (for reviews of this process, see  
51 [9, 18, 19]).

52  
53 Defects in the movement of neuroblasts to close the ventral cleft are observed in embryos  
54 defective in several cell signaling pathways, including those involving Eph/ephrin signaling [16,  
55 20, 21], PTP-3/LAR (Leukocyte Common Antigen Related Receptor, a protein tyrosine  
56 phosphatase; [22]), semaphorin-2A/MAB-20/plexin signaling [23, 24], and the *C. elegans*  
57 Kallmann syndrome ortholog *kal-1* [25, 26]. Such defects result in an enlarged or persistent  
58 ventral cleft; if the ventral cleft is not closed by the time of epidermal enclosure, enclosure  
59 movements are often disrupted.

60  
61 The motile events downstream of cell signaling at the ventral cleft are poorly understood; loss of  
62 function of the SCAR/WAVE gene *wve-1* leads to significant defects in ventral neuroblast  
63 organization [27], suggesting that actin-based motility may be important for ventral neuroblast  
64 movement. Filopodial protrusions have been observed during cleft closure, but their significance  
65 is unclear [28]. As ventral neuroblasts move together, surrounding cells adjacent to the cleft must  
66 rearrange as the cleft closes [12]. After the events of ventral cleft closure, the neuroblasts that

67 seal the cleft divide and rearrange to form part of the presumptive ventral nerve cord before the  
68 embryo begins to elongate into a vermiform shape [9, 29]. Ventral neuroblasts later accumulate  
69 myosin foci and cadherin complex proteins [30].

70

71 Internalization of cells during gastrulation in *C. elegans* involves detachment of cells from their  
72 neighbors and establishment of new connections among cells remaining at the ventral surface, so  
73 changes in cell-cell adhesion must presumably occur during this process. The *C. elegans*  
74 cadherin/catenin complex (CCC) has been the focus of significant attention in this regard. The  
75 core components of the CCC, HMR-1/cadherin, HMP-2/ $\beta$ -catenin, and HMP-1/ $\alpha$ -catenin, are  
76 present in the early embryo before gastrulation begins [11, 14, 31]. While there is not an  
77 essential requirement for cadherin-dependent adhesion during Ea/p internalization in otherwise  
78 wild-type embryos, there is a synergistic requirement for the cadherin complex when the  
79 L1CAM homologue SAX-7 or CED-5/DOCK180 is depleted [32, 33]. Accumulation of CCC  
80 components at the interface between cells that internalize and those that remain on the surface  
81 has been proposed to aid recruitment of actomyosin contractile networks necessary for  
82 internalization [5, 11], after engagement of an actomyosin-mediated “clutch” in Ea/p [13].

83

84 Much of the focus regarding the CCC during gastrulation has been on the internalizing cells,  
85 specifically Ea/p. Requirements for the CCC in subsequent internalizations have not been  
86 specifically analyzed, nor has the role of the CCC in resealing the ventral surface after  
87 internalization been assessed. We set out to investigate roles for the core CCC component, HMP-  
88 1, in these processes. In addition, we turned our attention to SRGP-1/srGAP, the lone slit/robo  
89 GTPase activating protein in *C. elegans* [28, 34]. We showed previously that SRGP-1 is a

90 modulator of cell-cell adhesion during the later events of ventral enclosure [28] and embryonic  
91 elongation [35, 36]. In addition, however, *srGP-1* knockdown in *hmp-1(fe4)* mutants leads to Gex  
92 (Gut on the exterior) phenotypes due to a failure to complete cleft closure [28], implicating it in  
93 the earlier events of internalization and ventral sealing at the end of gastrulation.

94

95 SRGP-1 is a homolog of vertebrate Slit/Robo GTPase Activating Proteins (srGAPs), which have  
96 an N-terminal F-BAR domain that associates with curved membranes, a central RhoGAP  
97 domain, and an SH3 domain which has been shown to associate with various other factors such  
98 as WAVE, WASP, and Lamellipodin [37-39]. SRGP-1 in *C. elegans* does not contain an SH3  
99 domain; nevertheless, we showed previously that the SRGP-1 C-terminus interacts with both the  
100 N-terminal half of SRGP-1 [28] and with HMP-1 [35]. Overexpression of the F-BAR domain of  
101 SRGP-1 leads to ectopic membrane tubulations. The C-terminus of SRGP-1 is required to recruit  
102 HMP-1 into these tubulations [28] and for normal HMP-1 dynamics [36], consistent with a role  
103 for the SRGP-1 C terminus is coordinating the interaction with HMP-1.

104

105 Here we investigated the role of SRGP-1 prior to epidermal morphogenesis, as the ventral  
106 surface seals the final breaches due to cell internalization at the end of gastrulation. We found  
107 that SRGP-1 is required for normal cell behavior, cell morphology, and HMP-1 recruitment  
108 during this essential process. We also found that destabilizing salt bridge mutations within the M  
109 (middle) domain of HMP-1, which cause the M domain to remain in an extended state and  
110 abrogate binding by the SRGP-1 C terminus [35], are able to suppress SRGP-1 phenotypes. This  
111 suppression may be in part due to increased recruitment of components that interact with an open  
112 conformation of the M domain, including the *C. elegans* afadin homologue, AFD-1.

113

114 **Results**

115 *Mutations in *srgp-1* lead to cleft closure defects*

116 Our prior work established a role for SRGP-1 in the embryonic epidermis in *C. elegans* [28, 35],  
117 but srGAPs in vertebrates were originally identified through their roles in the developing nervous  
118 system [39-43]. In *C. elegans*, a majority of neuroblasts are found on the ventral side of the  
119 embryo following gastrulation [9, 17]. These neuroblasts must (1) adhere to one another to keep  
120 other tissues internalized during gastrulation (reviewed in [5, 9]), (2) divide and rearrange to  
121 form part of the ventral nerve cord [29], and (3) act as a substrate for the epidermis, which  
122 undergoes epiboly during ventral enclosure [23, 30, 44]. Using 4D DIC microscopy, we  
123 observed that an appreciable percentage (11.1%) of homozygotes for *srgp-1(jc72)*, a nonsense  
124 allele hereafter referred to as *srgp-1<sup>W122Stop</sup>* (Fig. 1A), do not complete ventral cleft closure at the  
125 end of gastrulation, leading to endodermal precursors being extruded when the epidermis  
126 attempts to undergo epiboly and the contractions normally associated with embryonic elongation  
127 (Figure 1B, second row).

128

129 SRGP-1 has three major functional domains: (1) an N-terminal F-BAR domain, (2) a central  
130 GAP domain, and (3) an unstructured C-terminal region that is involved in protein-protein  
131 interactions (see Figure 1A, [28, 34, 35, 45]) We explored whether one of these domains might  
132 be important for SRGP-1 function during cleft closure. Using CRISPR/Cas9 methodology, we  
133 generated the following alleles: *srgp-1<sup>AF-BAR</sup>*, missense allele *srgp-1<sup>R563A</sup>*, which prevents GAP  
134 activity [34, 46], and *srgp-1<sup>AC</sup>*, which deletes most of the region C-terminal to the GAP domain.  
135 Loss of the SRGP-1 F-BAR domain and C-terminal region both led to cleft closure defects

136 following gastrulation (Figure 1B). The percentages of embryos that displayed cleft closure  
137 defects were similar between *srgp-1 $\Delta$ C* and *srgp-1<sup>W122Stop</sup>* alleles; while we observed cleft closure  
138 defects in *srgp-1 $\Delta$ F-BAR* mutant embryos, the lower frequency did not rise to the level of statistical  
139 significance compared to wildtype, in which we did not observe cleft closure defects (Figure  
140 1C). As in our previous studies examining the epidermal functions of SRGP-1 [28], we did not  
141 observe any obvious defects in embryos lacking SRGP-1 GAP functionality. These results  
142 suggest that important aspects of SRGP-1 function during cleft closure are mediated through its  
143 C terminus, with the F-BAR domain playing a supporting role.

144

145 *HMP-1 and SRGP-1 co-localize at the vertices of rosettes following the last internalization*  
146 *events of gastrulation*

147 Gastrulation in *C. elegans* involves the internalization of progenitor cells that generate  
148 endoderm, mesoderm, and germ line tissues. As these cells move into the interior, they undergo  
149 apical constriction. As they do so, neighboring cells form transient rosettes to cover the space  
150 vacated by the departing cells [12]. We examined endogenously tagged HMP-1::mScarlet-I and  
151 SRGP-1::mNeonGreen in living embryos, beginning with ventral cleft formation through the  
152 final internalization events of gastrulation, which occur after cleft closure (Figure 2A). Two  
153 rosettes form and resolve at this stage, involving cells born on the left and right sides of the  
154 ventral cleft (Figure 2A, yellow dotted line; B, colored cells). At the vertex of the anterior  
155 rosette, where cells internalize, we observed a bright accumulation of HMP-1::mScarlet-I  
156 immediately after the internalization event (Figure 2A, white arrowhead). Subsequent to the  
157 accumulation of HMP-1 in the anterior rosette, the posterior rosette resolved and elongated along  
158 the anterior-posterior axis, forming new cell contacts as it did so (Figure 2A; yellow arrowheads



159 at 10 min indicate direction of cell movement by 20 min). Significantly, SRGP-1 also  
160 accumulated at vertices in both the anterior and posterior rosettes (Fig. 2A, 0 min, arrowheads).  
161  
162 We previously demonstrated that homozygotes carrying a nonsense allele of *srgp-1* display  
163 decreased HMP-1 junctional intensity [35]. We therefore sought to determine whether *srgp-1*  
164 mutant backgrounds could influence the localization of HMP-1 during rosette formation,  
165 focusing on the anterior rosette. We examined localization of HMP-1::mScarlet-I within the  
166 anterior rosette before and after the final set of cell internalizations (Figure 3; blue dotted line  
167 indicates internalizing cells). In a full-length, endogenously tagged *srgp-1* background, HMP-1  
168 accumulated at the vertex formed by the disappearance of internalizing cells (Figure 3A, 0 min).  
169 In contrast, in *srgp-1<sup>ΔF-BAR</sup>* mutants HMP-1 at the vertex failed to coalesce into a single cluster  
170 (Figure 3B, 0 minutes). In addition, a stable rosette no longer formed, and the remaining  
171 neuroblasts instead coalesced into two rows with no central vertex (Figure 3B, yellow lines). In  
172 *srgp-1<sup>ΔC</sup>* mutants clusters of SRGP-1 accumulated within neuroblasts with no apparent pattern;  
173 while HMP-1 was still able to coalesce around the rosette, multiple clusters with accumulated  
174 HMP-1 were visible (Figure 3C). Taken together, these results indicate that both the SRGP-1 N-  
175 and C-terminal regions have important roles during cleft closure. The F-BAR domain appears to  
176 be important for organizing the tips of cells within rosettes into a single vertex, whereas the C-  
177 terminus may play an important role in spatially organizing and interacting with HMP-1 during  
178 this process.

179

180 *Destabilizing the M domain of HMP-1 suppresses cleft closure defects in srgp-1 mutants*

181 The M domain of HMP-1 forms a closed structure that is stabilized by multiple salt bridges  
182 (Figure 4A; [47]). Mutating Arginines 551 and 554 to alanines prevents two of these salt bridges  
183 from forming between MII and MIII; as a result, the HMP-1 M domain adopts a constitutively  
184 open conformation that prevents the recruitment of the SRGP-1 C-terminus [35]. Although the  
185 *hmp-1<sup>R551/554A</sup>* mutation abrogates interaction with the C-terminus of SRGP-1, there is evidence  
186 in vertebrates that an extended conformation of  $\alpha$ -catenin may activate actin binding and/or  
187 recruitment of other binding partners, including vinculin [48-53] and afadin [54]. We therefore  
188 assessed whether a constitutively open conformation of HMP-1 could bypass the requirement for  
189 SRGP-1 at the end of gastrulation.

190

191 Mutants homozygous for *hmp-1<sup>R551/554A</sup>* and either the *srgp-1<sup>W122Stop</sup>* or the *srpg-1<sup>AC</sup>* allele  
192 displayed fewer cleft closure defects compared to *srgp-1<sup>W122Stop</sup>* or *srpg-1<sup>AC</sup>* homozygotes with  
193 wild-type *hmp-1*; in contrast, there was no change in frequency of cleft closure defects in *srpg-1<sup>AC</sup>*  
194 *1 $\Delta$ F-BAR* homozygotes when the salt bridge mutations were introduced (Figure 4B). These results  
195 suggest that an open conformation of the HMP-1 M domain can bypass some functions normally  
196 performed by the SRGP-1 C-terminus, but that the SRGP-1 F-BAR domain is still required,  
197 presumably independently of binding of the SRGP-1 C terminus to the HMP-1 M domain.

198

199 To test if the salt bridge mutations in HMP-1 truly behave as gain-of-function mutations, we  
200 introduced these mutations into the *hmp-1(fe4)* background. The *hmp-1(fe4)* allele, hereafter  
201 referred to as *hmp-1<sup>S823F</sup>*, replaces a serine with a phenylalanine (S823F) within the actin binding  
202 domain of HMP-1 and behaves as a hypomorph (Figure 4A; [55, 56]). *hmp-1<sup>S823F</sup>* homozygotes  
203 display morphogenetic failure and developmental arrest at a variety of stages, including during

204 cleft closure. Using CRISPR/Cas9 we introduced the R551/554A mutations into the *hmp-1*<sup>S823F</sup>  
205 background. Hermaphrodites homozygous for *hmp-1*<sup>R551/554A; S823F</sup> on average laid more embryos  
206 and had minimal body morphology defects compared to *hmp-1*<sup>S823F</sup> homozygotes (Figure 4C,F).  
207 *hmp-1*<sup>R551/554A; S823F</sup> homozygous embryos also showed reduced lethality compared to embryos  
208 homozygous for *hmp-1*<sup>S823F</sup> (Figure 4D,E). However, when we imaged *hmp-1*<sup>R551/554A; S823F</sup>  
209 embryos, we found that they were more sensitive to mechanical pressure in 10% agar mounts  
210 and required mounting on 5% agar pads (Figure S1), which we used for subsequent experiments  
211 utilizing this allele. We also observed that *hmp-1*<sup>S823F</sup> homozygotes exhibited increased  
212 embryonic lethality at colder temperatures (Figure 4D). We examined whether the *hmp-1*<sup>R551/554A</sup>  
213 mutation suppressed *hmp-1*<sup>S823F</sup> phenotypes at 15°C. The introduction of the salt bridge  
214 mutations partially suppressed embryonic lethality at 15°C, and, although it did not rise to the  
215 level of statistical significance, *hmp-1*<sup>R551/554A; S823F</sup> homozygotes reared at 15°C had an increase  
216 in brood size compared to *hmp-1*<sup>S823F</sup> homozygotes (Figure 4C,D). Taken together, these results  
217 indicate that the *hmp-1*<sup>R551/554A</sup> mutation acts as a gain-of-function allele that can partially offset  
218 reduction of actin binding activity conferred by the C-terminal *S823F* mutation.  
219  
220 We previously utilized *hmp-1*<sup>S823F</sup> hypomorphic (*hmp-1(fe4)*) homozygotes as a sensitized  
221 background to identify modulators of cadherin-dependent adhesion [57] and identified *srGP-1* as  
222 a strong enhancer of embryonic lethality in the *hmp-1*<sup>S823F</sup> background. RNAi knockdown of  
223 *srGP-1* resulted in nearly total embryonic lethality, while *srGP-1* knockdown by feeding RNAi in  
224 wild-type embryos had minimal effects. At least some of the synergistic lethality was caused by  
225 Gex phenotypes during ventral enclosure [28]. We therefore examined the synergistic effect of  
226 *srGP-1* RNAi knockdown in *hmp-1*<sup>R551/554A; S823F</sup> embryos. The salt bridge mutation was able to

227 reduce the embryonic lethality of *srgp-1(RNAi);hmp-1<sup>S823F</sup>* embryos significantly (Figure 4E).

228 These results confirm that an open conformation of the HMP-1 M domain is able to bypass some  
229 requirements for SRGP-1, in addition to its ability to compensate for reduced actin binding  
230 activity mediated by the HMP-1 C terminus.

231

232 *Loss of afd-1/afadin function leads to increased frequency of cleft closure defects*

233 Conformational changes within the  $\alpha$ -catenin M domain can affect its ability to recruit  
234 components that modulate cell adhesion. One such modulator in vertebrates is vinculin; when the  
235  $\alpha$ E-catenin M domain is extended, either via direct mechanical distension [58-60] or by  
236 introducing salt bridge mutations [51], its binding affinity for vinculin is increased. However,  
237 DEB-1, the vinculin homolog in *C. elegans* does not interact with HMP-1 [47], and its  
238 expression is confined to muscle cells during development [61-63], ruling it out as a candidate  
239 HMP-1 interactor that could be positively affected by the *R55I/554A* salt bridge mutations in the  
240 context of cleft closure. Another candidate modulator is AFD-1/afadin. Vertebrate afadin can  
241 bind to  $\alpha$ E-catenin [64, 65]. While there is currently no published evidence for direct binding of  
242 the *Drosophila* afadin, Canoe, to  $\alpha$ -catenin (M. Peifer and U. Tepass, pers. commun.), Canoe  
243 localizes to cell-cell junctions and modulates morphogenesis in a variety of contexts in  
244 *Drosophila* [66-71]. Moreover, we showed previously that AFD-1 can be co-  
245 immunoprecipitated with HMP-1 [72] and that loss of *afd-1* function synergizes with the *hmp-*  
246 *I<sup>S823F</sup>* mutation during later morphogenesis [57]. We therefore examined whether *afd-1* loss of  
247 function showed genetic interactions with *srgp-1* and with *hmp-1* salt bridge mutations.

248

249 We first determined whether *afd-1* RNAi led to cleft closure defects and lethality in wild-type  
250 embryos or in embryos homozygous for the *hmp-1*<sup>S823F</sup> allele (Figure 5A-C). Knockdown of  
251 *srpg-1* or *afd-1* led to comparable levels of lethality and cleft closure defects in otherwise wild-  
252 type embryos on agar mounts. Moreover, RNAi against either *srpg-1* and *afd-1* caused a  
253 significant increase in cleft closure defects in *hmp-1*<sup>S823F</sup> embryos on plates or agar mounts  
254 (Figures 5A-C). Since both *srpg-1* and *afd-1* knockdown increased the frequency of cleft closure  
255 defects in *hmp-1*<sup>S823F</sup>, we examined how *afd-1* knockdown genetically interacted with *srpg-1* loss  
256 of function and with the *hmp-1*<sup>R551/554A</sup> mutation. In wild-type, *hmp-1*<sup>R551/554A</sup>, and *srpg-1*<sup>W122Stop</sup>  
257 backgrounds, *afd-1* knockdown resulted in an increase in cleft closure defects (Figure 5C). In  
258 *srpg-1*<sup>W122Stop</sup>; *hmp-1*<sup>R551/554A</sup> double mutants, loss of *afd-1* resulted in a higher frequency of cleft  
259 closure defects than in *hmp-1*<sup>R551/554A</sup> alone, but less than in *srpg-1*<sup>W122Stop</sup> mutants alone,  
260 suggesting that there may be additional factors beyond AFD-1 that may stabilize HMP-1 when it  
261 adopts an open conformation.

262  
263 Computational work was previously used to engineer the actin binding domain of human  $\alpha$ E-  
264 catenin to bind actin with higher affinity [50]. Using protein alignment, we identified the  
265 homologous amino acids in HMP-1 and generated *hmp-1*<sup>Q<sub>NLM676-679</sub>GSGS</sup>, which is predicted to  
266 bind actin with higher affinity (Figure S2A,B). Embryos homozygous for *hmp-1*<sup>Q<sub>NLM676-679</sub>GSGS</sup>  
267 have a low level of embryonic lethality, which causes developmental arrest at various embryonic  
268 stages, including during cleft closure. These phenotypes were suppressed by loss of function of  
269 *srpg-1* and *afd-1* (Figure S2C,D). These results suggest that HMP-1 stability and linkage to the  
270 actin network must be maintained within a dynamic range during processes that contribute to  
271 cleft closure.

272

273 *AFD-1 localizes to the vertex of the anterior rosette at the end of gastrulation*

274 Since genetic perturbation of *afd-1* had consequences for cleft closure, we next assessed the  
275 localization of AFD-1 during cleft closure. We visualized mKate2::AFD-1 and HMP-1::GFP  
276 from cleft closure through rosette formation. While expression of mKate2::AFD-1 in the ventral  
277 neuroblasts was weak, we observed strong accumulation of AFD-1 at the vertex of the anterior  
278 rosette immediately following the final internalization events of gastrulation, which quickly  
279 dispersed as the rosette resolved (Figure 6A). We next examined HMP-1 accumulation and  
280 localization at the vertex of the anterior rosette in various mutant backgrounds (Figure 6B). Total  
281 accumulation of HMP-1::GFP increased in the *hmp-1<sup>R551/554A</sup>* mutant background, but RNAi  
282 against *afd-1* reduced total HMP-1 accumulation at the vertex, as well as the spatial extent of  
283 HMP-1 accumulation at the vertex. We did not find a significant change in AFD-1 accumulation  
284 in *srGP-1<sup>W122Stop</sup>* mutants; while there was an increase in AFD-1 accumulation in *hmp-1<sup>R551/4A</sup>*  
285 homozygotes, it did not quite rise to statistical significance (Figure S3). These results suggest  
286 that while SRGP-1 may play an important role in orienting cells during rosette formation and  
287 organizing HMP-1 around the vertex, AFD-1 is essential for normal HMP-1 accumulation at the  
288 vertex following the final internalization events of gastrulation. Unfortunately, we could not  
289 perform the converse experiment to address whether AFD-1 recruitment requires HMP-1 at this  
290 stage of development, because depletion of maternal and zygotic HMP-1 leads to catastrophic  
291 morphogenetic failure, including lack of cleft closure [31, 73].

292

## 293 **Discussion**

294 *Rosette formation during C. elegans gastrulation requires cadherin-based adhesion*

295 Ventral cleft closure is the culmination of gastrulation in the *C. elegans* embryo. It is essential  
296 for proper organization and cohesion of neuroblasts following gastrulation, which in turn is  
297 crucial for the embryo to survive the mechanical forces that operate during later morphogenesis  
298 [5, 9, 12]. Here we have characterized the cell rearrangements that accompany sealing of the  
299 ventral surface of the embryo, as cells on the surface change position to accommodate loss of  
300 cells that internalize near the end of gastrulation. Specifically, we have demonstrated that HMP-  
301 1/ $\alpha$ -catenin and two of its functional modulators, SRGP-1/srGAP and AFD-1/afadin, facilitate  
302 the adhesion of cells during this critical stage in embryogenesis in the *C. elegans* embryo. Based  
303 on prior work, rosettes that form as a result of earlier cell internalization events in *C. elegans*  
304 appear similar [12], so insights gleaned from studying these later events will likely be useful in  
305 understanding other internalization events in the earlier embryo.

306  
307 Cell internalization is a common event during gastrulation in metazoan embryos, as cells  
308 destined for the embryo's interior detach their apical surfaces from the embryo's exterior [2-5].  
309 Given the apical-to-basal axis of such movements during *C. elegans* gastrulation, internalization  
310 also bears similarities to other basal extrusion events, often triggered by apoptosis or cell  
311 crowding in a variety of epithelia (reviewed in [74-76]). In all these cases, however, relatively  
312 little attention has been paid to how the cells that remain on the surface seal breaches on the  
313 embryonic exterior left behind by internalizing cells. At least in some cases, such tissue sealing  
314 involves multicellular rosette formation. The geometry of these rosettes bears similarities to  
315 those associated with other morphogenetic processes, such as convergent extension [77]. An  
316 intriguing parallel to the rosettes we observed are those observed in the chick epiblast [3, 78, 79].  
317 Although the functional significance of the rosette structures in the primitive streak is unclear,

318 these may reflect similar events at sites where cells depart from the surface of the embryo during  
319 gastrulation.

320

321 Rosettes in other contexts, such as during convergent extension in the *Drosophila* germband,  
322 involve modulation of adhesion complexes as cells change their connections to one another [80,  
323 81]. In contrast, little is known about adhesive changes among neighboring non-intercalating  
324 cells that seal gaps left behind by ingressing cells. In the case of sea urchin primary mesenchyme  
325 cells, which exhibit many aspects of standard epithelial-mesenchymal transition [82], cells lose  
326 cadherin-catenin complex components at the time of ingression [82, 83]. The situation may be  
327 different in gastrulating cells in *C. elegans* and *Drosophila* neuroblasts; in the former, at least in  
328 the case of internalization of endodermal founder cells Ea and Ep, CCC components are  
329 transiently upregulated during apical constriction [11], while in the latter, post-translational loss  
330 of CCC components can be uncoupled from ingression events [84]. These differences indicate  
331 that while many processes may be conserved during internalization events, there may be a  
332 variety of mechanisms involved.

333

334 Our results shed light on this relatively understudied process by demonstrating that rosette  
335 formation at the end of gastrulation in *C. elegans* requires a robust cell-cell adhesion machinery.  
336 Reduction in the ability of HMP-1/ $\alpha$ -catenin to bind F-actin in *hmp-1<sup>S823F</sup>* mutants leads to an  
337 increase in ventral cleft closure failure, as does loss of the HMP-1 binding partner, SRGP-1. The  
338 cells surrounding the position of the vacated cell at the end of ventral cleft closure form a rosette,  
339 which ultimately resolves as cells make new connections to one another at the site of sealing.

340



341 *Rosette formation is fostered by activating HMP-1/ $\alpha$ -catenin*

342 We and others have shown that the  $\alpha$ -catenin M domain engages in interactions that regulate the  
343 C-terminal F-actin binding region of  $\alpha$ -catenins [50, 85]. In this context it is striking that the  
344 *hmp-1<sup>R551/554A</sup>* mutation suppresses phenotypes associated with the *S823F* mutation, which we  
345 have shown previously measurably decreases the F-actin binding activity of HMP-1 [86].  
346 Previous intragenic suppressors all clustered in the C terminus of HMP-1, not in the M domain  
347 [86]. Our present results provide further evidence that the conformation of the M domain is  
348 relevant to the ability of HMP-1 to interact, either directly or indirectly, with the actin  
349 cytoskeleton.

350

351 *Rosette formation depends on proper HMP-1/ $\alpha$ -catenin localization mediated by both the C-*  
352 *terminus and F-BAR domains of SRGP-1/srGAP*

353 Salt bridges in the M domain of mammalian  $\alpha$ E-catenin stabilize the M domain in a “closed”  
354 conformation, reducing the likelihood of association of vinculin [51, 59]. In *C. elegans*, however,  
355 we have shown previously that DEB-1/vinculin is confined to myoblasts in the early embryo,  
356 and that it does not bind HMP-1 [47, 86], suggesting that HMP-1 interacts with other effectors in  
357 non-muscle cells. In addition to its utility in identifying intramolecular interactions that regulate  
358 HMP-1 activity, the *hmp-1<sup>S823F</sup>* mutation has been useful as a sensitized background for  
359 identifying such functional interactors. Both SRGP-1/srGAP and AFD-1/afadin were identified  
360 in a genome-wide RNAi screen for such interactors [57]. Our previous analysis indicated that the  
361 C terminus of SRGP-1 can physically bind the HMP-1 M domain, but, unlike the case with  
362 vertebrate  $\alpha$ E-catenin and vinculin, not when the HMP-1 M domain is fully extended. We also

363 showed that both the N-terminal F-BAR and C-terminal domains of SRGP-1 are functionally  
364 important during elongation [36].

365

366 Our analysis here also revealed roles for the N- and C-terminal regions of SRGP-1 during ventral  
367 cleft closure. HMP-1 becomes highly concentrated at the tips of cells at rosette vertices in  
368 embryos expressing endogenously tagged, full-length SRGP-1. The greater severity of gross  
369 morphological defects in *srgp-1* nonsense and C-terminal deletion mutants further suggests a  
370 more stringent requirement for the C terminus, which is lacking in both mutants, in stabilizing  
371 HMP-1. Since the SRGP-1 C terminus is intact in *srgp-1<sup>ΔF-BAR</sup>* mutants, it is possible that,  
372 whereas SRGP-1<sup>ΔF-BAR</sup> can no longer interact with the membrane directly to stabilize the CCC,  
373 when the N-terminus is absent SRGP-1 can still interact with HMP-1 in some functional  
374 capacity. In this case HMP-1 presumably exclusively relies on its association with the HMP-  
375 1/HMP-2/HMR-1 heterotrimeric complex to associate with the plasma membrane, which is less  
376 efficient in recruiting HMP-1 at sites of high membrane curvature, such as cell tips at rosette  
377 vertices. The likelihood of this possibility is strengthened by our observation that *srgp-1<sup>ΔF-BAR</sup>*  
378 homozygous embryos exhibit less lethality than *srgp-1<sup>W122Stop</sup>* and *srgp-1<sup>ΔC</sup>* homozygotes. In our  
379 previous work we suggested that there may be a second region of SRGP-1, which lies N-terminal  
380 to the C-terminal region, that can interact with some junctional component— possibly including  
381 HMP-1 [28, 36]; our present work is consistent with this possibility.

382

383 A distinct role for the SRGP-1 N terminus is also suggested by our results. When the SRGP-1 F-  
384 BAR domain is deleted the tips of cells in the rosette are blunted and HMP-1 forms multiple  
385 aggregates in cells in the rosette, leading to less robust rosettes. In our previous work we

386 observed reduced membrane curvature at the leading edge during ventral epidermal enclosure,  
387 suggesting that SRGP-1 promotes highly curved membranes [28]. Our present results are  
388 consistent with a similar role at nascent rosette vertices, which require that the plasma  
389 membranes of cell tips in the rosette adopt a high degree of curvature. SRGP-1 may either  
390 stabilize such highly curved regions of the plasma membrane or be recruited to such sites,  
391 leading to clustering of HMP-1 at such sites to stabilize nascent adhesions. The loss of normal  
392 HMP-1 accumulation at cell tips in *hmp-1<sup>AF-BAR</sup>* mutants is consistent with this possibility and  
393 suggests that not only is membrane curvature adversely affected, but that HMP-1 recruitment to  
394 sites of high membrane curvature is reduced, with adverse effects on rosettes.

395

396 The *hmp-1<sup>R551/554A</sup>* mutation, which maintains the HMP-1 M domain in an open conformation  
397 [36], can suppress cleft closure defects caused by loss of the SRGP-1 C-terminus, but not those  
398 resulting from loss of the SRGP-1 F-BAR domain (see Figure 4B). There are several potential  
399 explanations for this result. One possibility is that the C terminus of SRGP-1 regulates HMP-1  
400 function beyond localization. For example, the C terminus of SRGP-1, once bound, could  
401 facilitate further opening and activation of the HMP-1 M domain, leading to recruitment of other  
402 binding partners. Constitutive opening of the HMP-1 M domain in *hmp-1<sup>R551/554A</sup>* mutants could  
403 obviate this requirement. Alternatively, if the major role of the SRGP-1 C terminus is to fine-  
404 tune the localization or stability of HMP-1, the enhanced activity of a fully open HMP-1 could  
405 offset the quantitative loss of HMP-1 at nascent junctions in rosettes.

406

407 *Rosette formation is fostered by recruitment of AFD-1/afadin*

408 AFD-1 accumulation at the vertex of the anterior rosette is striking compared to the low levels of  
409 AFD-1 accumulation elsewhere at this stage of development, including the posterior rosette,  
410 within which we did not see a similar accumulation of AFD-1. This indicates that junctions at the  
411 anterior rosette vertex are unique among cell-cell adhesions between ventral cells in the embryo  
412 at this stage, and that AFD-1/afadin is crucial for stabilizing them. Vertebrate afadin and  
413 *Drosophila* Canoe are recruited to junctions under increased tension or to sites with increased  
414 cellular (and hence actomyosin) dynamics [87-89]. In *C. elegans*, during later development when  
415 the epidermis is under substantial mechanical tension, AFD-1 appears at epidermal cell-cell  
416 junctions [57], consistent with tension-induced recruitment at that stage. That AFD-1 is recruited  
417 to the tips of cells in the anterior rosette vertex at the end of gastrulation suggests that the tips of  
418 these cells likewise experience increased tension. As the internalization event that forms the  
419 anterior rosette concludes, multiple cells must converge to create new contact points, which are  
420 susceptible to mechanical failure. A similar accumulation of AFD-1 is not observed in the  
421 posterior rosette, however. Notably, the cells of the posterior rosette undergo rapid extension  
422 shortly after rosette formation, whereas the anterior rosette persists. Work in *Drosophila* has  
423 demonstrated a necessity for Canoe localization to maintain tricellular junctions experiencing  
424 high tension; however, prolonged and continued accumulation of Canoe at junctions prevents  
425 vertex resolution during cell rearrangement [90]. If AFD-1 works in a similar fashion in *C.*  
426 *elegans*, this could imply that AFD-1 is required to stabilize the anterior rosette under higher  
427 mechanical loads.

428

429 We also found that, as is the case for *srGP-1*, loss of *afd-1* function leads to ventral cleft closure  
430 defects that can be suppressed via the *hmp-1*<sup>R551/554A</sup> mutation. Moreover, simultaneous depletion

431 of SRGP-1 and AFD-1 leads to synergistic ventral cleft closure defects. One reasonable model  
432 that accounts for this data is that, while SRGP-1 fosters the initial recruitment of HMP-1 to  
433 nascent contact sites within rosettes, AFD-1 subsequently stabilizes more mature adhesions,  
434 allowing them to withstand tension prior to rosette resolution. In this case, forcing HMP-1 into  
435 an open conformation may be able to bypass functional requirements for SRGP-1 by increasing  
436 the stability of adhesions through additional AFD-1 recruitment. It remains unclear whether  
437 AFD-1 can directly interact with HMP-1 in the way that their vertebrate counterparts do [54, 65],  
438 or if AFD-1 is recruited to cell-cell adhesion sites through other effectors that in turn depend on  
439 an open conformation of HMP-1. Since defects in *afd-1*(RNAi); *srpg-1*<sup>W122Stop</sup> double loss-of-  
440 function embryos are still suppressed by *hmp-1*<sup>R551/554A</sup>, there may be additional mechanisms that  
441 are stimulated by an open conformation of the HMP-1 M domain.

442

443 In conclusion, this work has clarified how cadherin-dependent adhesion between non-  
444 internalizing neighbors of internalizing cells, supported by SRGP-1/srGAP and AFD-1/afadin,  
445 stabilizes nascent cell-cell adhesions following the internalization events of gastrulation. Future  
446 work focused on identifying other factors that play a role in anterior rosette formation and that  
447 dissects the mechanisms through which SRGP-1, AFD-1, and HMP-1 work together in this  
448 process should continue to clarify the cellular events of tissue sealing following internalization.

449

#### 450 **Acknowledgements**

451 Some strains were provided by the *C. elegans* Genetics Center, which is funded by the NIH  
452 Office of Research Infrastructure Programs (P40 OD010440). JS and JH were supported by NIH

453 grants R01GM058038, R01GM127687, and R35GM145312. BG was supported by NIH grant  
454 R35GM134838. MMS was supported by NIH grant F32GM119348

455

## 456 **Contributions**

457 JMS designed, implemented, and analyzed experiments, designed and generated the novel *srgp-1*  
458 and *hmp-1* CRISPR alleles, and wrote and edited drafts of the manuscript. MMS generated the  
459 *afd-1* knock-in allele. BG commented on the manuscript. JH oversaw experimental design,  
460 implementation, and analysis and edited the manuscript.

461

## 462 **Figure Legends**

463 **Figure 1 Genetic perturbation of *srgp-1* leads to cleft closure defects. (A)** A map depicting  
464 the domains of SRGP-1 including mutants used in this study (*srgp-1<sup>W122Stop</sup>*, *srgp-1<sup>R563A</sup>*, *srgp-*  
465 *1<sup>AF-BAR</sup>*, and *srgp-1<sup>AC</sup>*). **(B)** DIC images of embryos over 230 minutes. White dotted lines depict  
466 the ventral cleft. The first row depicts a typical wild-type embryo proceeding through cleft  
467 closure and into early elongation. *srgp-1<sup>W122Stop</sup>*, *srgp-1<sup>AF-BAR</sup>*, and *srgp-1<sup>AC</sup>* mutants all display  
468 cleft closure failure, resulting in extruded endoderm (yellow dotted lines). Scale bar is 10  $\mu$ m.  
469 **(C)** A graph depicting percentage cleft closure defects in wild-type and *srgp-1* mutants. \*\*\*\*,  $p$   
470  $< 0.0001$ ; \*,  $p < 0.05$ .

471 **Figure 2 Rosette formation leads to cell rearrangement during cleft closure. (A)** An embryo  
472 expressing SRGP-1::mNeonGreen and HMP-1::mScarlet-I before, during, and after anterior  
473 rosette formation (ventral view), showing the cell rearrangements that take place to seal the  
474 ventral cleft. Times are relative to formation of the anterior rosette ( $t = 0$  min). White dotted lines  
475 outline cells involved in rosette formation. Blue dotted lines indicate cells that internalize. White

476 arrowhead indicates the vertex of the anterior rosette. Yellow arrows indicate the direction of cell  
477 movement at the posterior end of the embryo following anterior rosette formation. **(B)** Cell  
478 tracings of the embryos in (A). Internalizing cells are colored grey, cells that form rosettes are  
479 colored, all other cells are white. Scale bar is 10  $\mu$ m.

480 **Figure 3 *srgp-1* mutants display aberrant HMP-1::mScarlet-I aggregation and anterior**  
481 **rosette formation.** Representative embryos expressing full-length or deleted SRGP-  
482 1::mNeonGreen, as well as HMP-1::mScarlet-I. **(A)** SRGP-1::mNeonGreen; **(B)** SRGP-1 <sup>$\Delta$ F-</sup>  
483 <sup>BAR</sup>::mNeonGreen; **(C)** SRGP-1 <sup>$\Delta$ C</sup>::mNeonGreen. Blue dotted lines indicate cell internalization  
484 that precedes formation of rosettes. White arrowheads indicate the vertex of the rosette following  
485 cell internalization. White dotted lines outline cells that contribute to the rosette; yellow dotted  
486 lines depict cells arranged around the vertex of the rosette. Scale bar is 5  $\mu$ m.

487 **Figure 4 The *hmp-1*<sup>R551/554A</sup> mutation suppresses defects due to *srgp-1* loss of function and**  
488 **reduced actin binding ability of HMP-1.** **(A)** A domain map of HMP-1 depicting the sites of  
489 the R551/554A and S823F variations. **(B)** Percentage cleft closure defects in *srgp-1* and *hmp-*  
490 *I*<sup>R551/554A</sup> mutants. **(C)** Fecundity of wildtype and various *hmp-1* mutants at 20°C and 15°C. **(D)**  
491 Embryonic lethality of wildtype and various *hmp-1* mutants at 20°C and 15°C. **(E)** Embryonic  
492 lethality of wildtype and various *hmp-1* mutants subjected to control (empty vector L4440) or  
493 *srgp-1* RNAi. **(F)** *hmp-1*<sup>S823F</sup> and *hmp-1*<sup>R551/554A; S823F</sup> hermaphrodites. Yellow arrowheads  
494 indicate abnormally shaped or swollen regions along the body. Red dotted lines indicate clubbed  
495 tails. Scale bar is 200  $\mu$ m. \*\*\*\*,  $p < 0.0001$ ; \*\*\*,  $p < 0.001$ ; \*\*,  $p < 0.01$ ; \*,  $p < 0.05$ .

496 **Figure 5 *srgp-1* and *hmp-1* genetically interact with *afd-1* during cleft closure.** **(A)** DIC  
497 images of *hmp-1*<sup>S823F</sup>, *hmp-1*<sup>S823F</sup>; *srgp-1*(RNAi), and *hmp-1*<sup>S823F</sup>; *afd-1*(RNAi) embryos over the

498 course of 270 minutes. Dotted white lines outline the ventral cleft. Yellow dotted lines indicate  
499 extruded gut. Scale bar is 10  $\mu$ m. **(B)** A stacked bar plot indicating the percentage of embryos  
500 that die during cleft closure, head enclosure, and elongation in various genetic backgrounds. *afd-*  
501 *1* and *srgp-1* knockdown in the *hmp-1<sup>S823F</sup>* background both significantly increase the percentage  
502 of cleft closure defects. **(C)** Percent cleft closure defects in various genetic backgrounds with or  
503 without depletion of *srgp-1* and *afd-1* via RNAi. **(D)** Percentage of cleft closure defects in  
504 embryos treated with Control or *afd-1* RNAi. \*\*\*\*,  $p < 0.0001$ ; \*\*\*,  $p < 0.001$ ; \*,  $p < 0.05$ .

505 **Figure 6 AFD-1 accumulates at the vertex of the anterior rosette.** **(A)** A typical embryo  
506 expressing HMP-1::GFP and mKate2::AFD-1 before, during, and after anterior rosette  
507 formation. White dotted line outlines cells that form the rosette. Blue dotted lines mark the  
508 anterior cells that internalize prior to formation of the rosette. White arrowheads indicate the  
509 vertex of the rosette. Scale bar is 10  $\mu$ m. **(B)** Images of HMP-1::GFP and mKate2::AFD-1  
510 localization at the anterior rosette immediately following internalization in various genetic  
511 backgrounds. White dotted lines outline cells forming the rosette; yellow dotted lines indicate  
512 ventral cleft that remains open. Scale bar is 5  $\mu$ m. **(C)** A graph depicting the total accumulation  
513 of HMP-1::GFP at the anterior rosette. **(D)** Graph depicting the area of HMP-1::GFP aggregation  
514 at the vertex of the anterior rosette. \*\*\*\*,  $p < 0.0001$ ; \*\*\*,  $p < 0.001$ ; \*\*,  $p < 0.01$ ; \*,  $p < 0.05$ .

515  
516 **Figure 7. Summary of the roles of SRGP-1 and AFD-1 in stabilizing HMP-1 at rosettes.** **(A)**  
517 A protein map depicting the proposed functional roles of SRGP-1 domains. **(B)** Visual summary  
518 of HMP-1 and SRGP-1 distribution in cells in different *srgp-1* mutant backgrounds. **(C)** Genetic  
519 pathways summarizing proposed routes by which HMP-1 is stabilized in wild-type and *srgp-*  
520 *1<sup>W122Stop</sup>*, *hmp-1<sup>R551/554A</sup>* backgrounds



521

522 **Materials and Methods**

523

524 *Strains and genetics*

525 *C. elegans* were maintained using standard methods. Bristol N2 was used as wildtype. A

526 complete list of strains and genotypes used in this manuscript can be found in Supplementary

527 Table 1.

528

529 *DIC imaging*

530 Four dimensional DIC movies were collected on either a Nikon Optiphot-2 microscope

531 connected to a QiCAM camera (QImaging) or an Olympus BX50 microscope connected to a

532 Scion CFW-1512M camera (Scion Corp.) using Micro-Manager software (v. 1.42) [91, 92].

533 ImageJ plugins (<https://worms.zoology.wisc.edu/research/4d/4d.html>) were used to compress

534 and view DIC movies. All embryos were mounted on 10% agar pads in M9 solution unless

535 otherwise specified.

536

537 *Confocal imaging*

538 Embryos were dissected from adult hermaphrodites and mounted onto 10% agar pads in M9

539 solution and imaged. For fluorescence imaging, a Dragonfly 500 spinning disc confocal

540 microscope (Andor Corp.), mounted on a Leica DMi8 microscope, equipped with an iXon-

541 EMCCD camera and controlled by Fusion software (Andor Corp.) was used to collect images

542 using 0.21  $\mu\text{m}$  slices with a 63 $\times$ /1.3 NA glycerol Leica objective at 20°C.

543

544 *CRISPR/Cas9 genome editing*

545 All novel knock-in and deletion alleles with *jc###* designation were generated via plasmid-based  
546 CRISPR/Cas9 [93] using repair templates cloned by SapTrap cloning [94]. Small substitution  
547 mutations were made via marker-free genome editing [95]. Guides, homology arm primers, and  
548 single-stranded repair templates for all CRISPR/Cas9 editing can be found in Supplementary  
549 Table 2.

550

#### 551 *Injection RNAi*

552 Injection RNAi was performed by synthesizing double-stranded RNA (dsRNA) using a T7  
553 Megascript kit (Invitrogen). The templates for *srgp-1* and control RNAi were obtained from a  
554 feeding library [96]. pIC386 was used as a template for production of *afd-1* dsRNA. dsRNA was  
555 injected at a concentration of 2 $\mu$ g/ $\mu$ L in nuclease free water. L4 worms were injected and aged  
556 overnight before embryos were dissected from mature adults for imaging.

557

#### 558 *Quantification and analysis*

559 Percentage cleft closure defects were measured from embryos mounted for DIC imaging.  
560 Embryonic lethality was quantified by dividing the number of unhatched embryos laid on a plate  
561 by the total number of embryos on the plate from a single hermaphrodite. Total accumulation  
562 (integrated signal) and aggregation size for HMP-1::GFP were measured by drawing a circle  
563 around GFP signal at the vertex immediately following the internalization event.

564

#### 565 *Statistical analysis*

566 Data from control and experimental groups were compared using one-way ANOVA with Tukey  
567 post hoc testing to assess significance between individual groups. All statistical analyses were  
568 carried out in Prism (GraphPad Corp.).  
569

570  
571  
572  
573  
574  
575  
576  
577  
578  
579  
580  
581  
582  
583  
584  
585  
586  
587  
588  
589  
590  
591  
592  
593  
594  
595  
596  
597  
598  
599  
600  
601  
602  
603  
604  
605  
606  
607  
608  
609  
610  
611  
612  
613  
614

## References

1. Solnica-Krezel L, Sepich DS. Gastrulation: making and shaping germ layers. *Annu Rev Cell Dev Biol.* 2012;28:687-717. Epub 20120709. doi: 10.1146/annurev-cellbio-092910-154043. PubMed PMID: 22804578.
2. Byrum CA. An analysis of hydrozoan gastrulation by unipolar ingression. *Dev Biol.* 2001;240(2):627-40. doi: 10.1006/dbio.2001.0484. PubMed PMID: 11784088.
3. Wagstaff LJ, Bellett G, Mogensen MM, Munsterberg A. Multicellular rosette formation during cell ingression in the avian primitive streak. *Dev Dyn.* 2008;237(1):91-6. doi: 10.1002/dvdy.21390. PubMed PMID: 18069691.
4. Shook DR, Keller R. Epithelial type, ingression, blastopore architecture and the evolution of chordate mesoderm morphogenesis. *J Exp Zool B Mol Dev Evol.* 2008;310(1):85-110. doi: 10.1002/jez.b.21198. PubMed PMID: 18041055.
5. Goldstein B, Nance J. *Caenorhabditis elegans* Gastrulation: A Model for Understanding How Cells Polarize, Change Shape, and Journey Toward the Center of an Embryo. *Genetics.* 2020;214(2):265-77. doi: 10.1534/genetics.119.300240. PubMed PMID: 32029580; PubMed Central PMCID: PMC7017025.
6. Mareel M, Bracke M, Van Roy F, Vakaet L. Expression of E-cadherin in embryogenetic ingression and cancer invasion. *Int J Dev Biol.* 1993;37(1):227-35. PubMed PMID: 8507565.
7. Wu SY, Ferkowicz M, McClay DR. Ingression of primary mesenchyme cells of the sea urchin embryo: a precisely timed epithelial mesenchymal transition. *Birth Defects Res C Embryo Today.* 2007;81(4):241-52. doi: 10.1002/bdrc.20113. PubMed PMID: 18228256.
8. Harrell JR, Goldstein B. Internalization of multiple cells during *C. elegans* gastrulation depends on common cytoskeletal mechanisms but different cell polarity and cell fate regulators. *Dev Biol.* 2011;350(1):1-12. Epub 20100926. doi: 10.1016/j.ydbio.2010.09.012. PubMed PMID: 20875815; PubMed Central PMCID: PMC3022094.
9. Chisholm AD, Hardin J. Epidermal morphogenesis. *WormBook.* 2005:1-22. Epub 20051201. doi: 10.1895/wormbook.1.35.1. PubMed PMID: 18050408; PubMed Central PMCID: PMC4781537.
10. Lee JY, Marston DJ, Walston T, Hardin J, Halberstadt A, Goldstein B. Wnt/Frizzled signaling controls *C. elegans* gastrulation by activating actomyosin contractility. *Curr Biol.* 2006;16(20):1986-97. doi: 10.1016/j.cub.2006.08.090. PubMed PMID: 17055977; PubMed Central PMCID: PMC2989422.
11. Marston DJ, Higgins CD, Peters KA, Cupp TD, Dickinson DJ, Pani AM, et al. MRCK-1 Drives Apical Constriction in *C. elegans* by Linking Developmental Patterning to Force Generation. *Curr Biol.* 2016;26(16):2079-89. Epub 20160721. doi: 10.1016/j.cub.2016.06.010. PubMed PMID: 27451898; PubMed Central PMCID: PMC4996705.
12. Pohl C, Tiongson M, Moore JL, Santella A, Bao Z. Actomyosin-based self-organization of cell internalization during *C. elegans* gastrulation. *BMC Biol.* 2012;10:94. Epub 20121130. doi: 10.1186/1741-7007-10-94. PubMed PMID: 23198792; PubMed Central PMCID: PMC3583717.
13. Roh-Johnson M, Shemer G, Higgins CD, McClellan JH, Werts AD, Tulu US, et al. Triggering a cell shape change by exploiting preexisting actomyosin contractions. *Science.* 2012;335(6073):1232-5. Epub 20120209. doi: 10.1126/science.1217869. PubMed PMID: 22323741; PubMed Central PMCID: PMC3298882.

- 615 14. Chihara D, Nance J. An E-cadherin-mediated hitchhiking mechanism for *C. elegans* germ  
616 cell internalization during gastrulation. *Development*. 2012;139(14):2547-56. Epub 20120606.  
617 doi: 10.1242/dev.079863. PubMed PMID: 22675206; PubMed Central PMCID:  
618 PMCPMC3383229.
- 619 15. Nance J, Priess JR. Cell polarity and gastrulation in *C. elegans*. *Development*.  
620 2002;129(2):387-97. doi: 10.1242/dev.129.2.387. PubMed PMID: 11807031.
- 621 16. George SE, Simokat K, Hardin J, Chisholm AD. The VAB-1 Eph receptor tyrosine  
622 kinase functions in neural and epithelial morphogenesis in *C. elegans*. *Cell*. 1998;92(5):633-43.  
623 doi: 10.1016/s0092-8674(00)81131-9. PubMed PMID: 9506518.
- 624 17. Sulston JE, Schierenberg E, White JG, Thomson JN. The embryonic cell lineage of the  
625 nematode *Caenorhabditis elegans*. *Developmental Biology*. 1983;100(1):64-119. doi:  
626 10.1016/0012-1606(83)90201-4.
- 627 18. Carvalho CA, Broday L. Game of Tissues: How the Epidermis Thrones *C. elegans*  
628 Shape. *J Dev Biol*. 2020;8(1). Epub 20200309. doi: 10.3390/jdb8010007. PubMed PMID:  
629 32182901; PubMed Central PMCID: PMCPMC7151205.
- 630 19. Vuong-Brender TT, Yang X, Labouesse M. *C. elegans* Embryonic Morphogenesis. *Curr*  
631 *Top Dev Biol*. 2016;116:597-616. Epub 20160201. doi: 10.1016/bs.ctdb.2015.11.012. PubMed  
632 PMID: 26970644.
- 633 20. Chin-Sang ID, George SE, Ding M, Moseley SL, Lynch AS, Chisholm AD. The ephrin  
634 VAB-2/EFN-1 functions in neuronal signaling to regulate epidermal morphogenesis in *C.*  
635 *elegans*. *Cell*. 1999;99(7):781-90. doi: 10.1016/s0092-8674(00)81675-x. PubMed PMID:  
636 10619431.
- 637 21. Chin-Sang ID, Moseley SL, Ding M, Harrington RJ, George SE, Chisholm AD. The  
638 divergent *C. elegans* ephrin EFN-4 functions in embryonic morphogenesis in a pathway  
639 independent of the VAB-1 Eph receptor. *Development*. 2002;129(23):5499-510. doi:  
640 10.1242/dev.00122. PubMed PMID: 12403719.
- 641 22. Harrington RJ, Gutch MJ, Hengartner MO, Tonks NK, Chisholm AD. The *C. elegans*  
642 LAR-like receptor tyrosine phosphatase PTP-3 and the VAB-1 Eph receptor tyrosine kinase have  
643 partly redundant functions in morphogenesis. *Development*. 2002;129(9):2141-53. doi:  
644 10.1242/dev.129.9.2141. PubMed PMID: 11959824.
- 645 23. Ikegami R, Simokat K, Zheng H, Brown L, Garriga G, Hardin J, et al. Semaphorin and  
646 Eph receptor signaling guide a series of cell movements for ventral enclosure in *C. elegans*. *Curr*  
647 *Biol*. 2012;22(1):1-11. Epub 20111222. doi: 10.1016/j.cub.2011.12.009. PubMed PMID:  
648 22197242; PubMed Central PMCID: PMCPMC4306670.
- 649 24. Nakao F, Hudson ML, Suzuki M, Peckler Z, Kurokawa R, Liu Z, et al. The PLEXIN  
650 PLX-2 and the ephrin EFN-4 have distinct roles in MAB-20/Semaphorin 2A signaling in  
651 *Caenorhabditis elegans* morphogenesis. *Genetics*. 2007;176(3):1591-607. Epub 20070516. doi:  
652 10.1534/genetics.106.067116. PubMed PMID: 17507686; PubMed Central PMCID:  
653 PMCPMC1931547.
- 654 25. Hudson ML, Kinnunen T, Cinar HN, Chisholm AD. *C. elegans* Kallmann syndrome  
655 protein KAL-1 interacts with syndecan and glypican to regulate neuronal cell migrations. *Dev*  
656 *Biol*. 2006;294(2):352-65. Epub 20060503. doi: 10.1016/j.ydbio.2006.02.036. PubMed PMID:  
657 16677626.
- 658 26. Rugarli EI, Di Schiavi E, Hilliard MA, Arbucci S, Ghezzi C, Faccioli A, et al. The  
659 Kallmann syndrome gene homolog in *C. elegans* is involved in epidermal morphogenesis and

- 660 neurite branching. *Development*. 2002;129(5):1283-94. doi: 10.1242/dev.129.5.1283. PubMed  
661 PMID: 11874923.
- 662 27. Withee J, Galligan B, Hawkins N, Garriga G. *Caenorhabditis elegans* WASP and  
663 Ena/VASP proteins play compensatory roles in morphogenesis and neuronal cell migration.  
664 *Genetics*. 2004;167(3):1165-76. doi: 10.1534/genetics.103.025676. PubMed PMID: 15280232;  
665 PubMed Central PMCID: PMCPMC1470955.
- 666 28. Zaidel-Bar R, Joyce MJ, Lynch AM, Witte K, Audhya A, Hardin J. The F-BAR domain  
667 of SRGP-1 facilitates cell-cell adhesion during *C. elegans* morphogenesis. *J Cell Biol*.  
668 2010;191(4):761-9. Epub 20101108. doi: 10.1083/jcb.201005082. PubMed PMID: 21059849;  
669 PubMed Central PMCID: PMCPMC2983056.
- 670 29. Shah PK, Tanner MR, Kovacevic I, Rankin A, Marshall TE, Noblett N, et al. PCP and  
671 SAX-3/Robo Pathways Cooperate to Regulate Convergent Extension-Based Nerve Cord  
672 Assembly in *C. elegans*. *Dev Cell*. 2017;41(2):195-203 e3. doi: 10.1016/j.devcel.2017.03.024.  
673 PubMed PMID: 28441532; PubMed Central PMCID: PMCPMC5469364.
- 674 30. Wernike D, Chen Y, Mastronardi K, Makil N, Piekny A. Mechanical forces drive  
675 neuroblast morphogenesis and are required for epidermal closure. *Dev Biol*. 2016;412(2):261-77.  
676 Epub 20160227. doi: 10.1016/j.ydbio.2016.02.023. PubMed PMID: 26923492.
- 677 31. Costa M, Raich W, Agbunag C, Leung B, Hardin J, Priess JR. A putative catenin-  
678 cadherin system mediates morphogenesis of the *Caenorhabditis elegans* embryo. *J Cell Biol*.  
679 1998;141(1):297-308. doi: 10.1083/jcb.141.1.297. PubMed PMID: 9531567; PubMed Central  
680 PMCID: PMCPMC2132712.
- 681 32. Grana TM, Cox EA, Lynch AM, Hardin J. SAX-7/L1CAM and HMR-1/cadherin  
682 function redundantly in blastomere compaction and non-muscle myosin accumulation during  
683 *Caenorhabditis elegans* gastrulation. *Dev Biol*. 2010;344(2):731-44. Epub 20100531. doi:  
684 10.1016/j.ydbio.2010.05.507. PubMed PMID: 20515680; PubMed Central PMCID:  
685 PMCPMC2914123.
- 686 33. Sawyer JM, Glass S, Li T, Shemer G, White ND, Starostina NG, et al. Overcoming  
687 redundancy: an RNAi enhancer screen for morphogenesis genes in *Caenorhabditis elegans*.  
688 *Genetics*. 2011;188(3):549-64. Epub 20110428. doi: 10.1534/genetics.111.129486. PubMed  
689 PMID: 21527776; PubMed Central PMCID: PMCPMC3176534.
- 690 34. Neukomm LJ, Frei AP, Cabello J, Kinchen JM, Zaidel-Bar R, Ma Z, et al. Loss of the  
691 RhoGAP SRGP-1 promotes the clearance of dead and injured cells in *Caenorhabditis elegans*.  
692 *Nat Cell Biol*. 2011;13(1):79-86. Epub 20101219. doi: 10.1038/ncb2138. PubMed PMID:  
693 21170032; PubMed Central PMCID: PMCPMC3808961.
- 694 35. Serre JM, Lucas B, Martin SCT, Heier JA, Shao X, Hardin J. A *C. elegans* srGAP is a  
695 novel  $\alpha$ -catenin M domain-binding protein that strengthens cadherin-dependent adhesion during  
696 morphogenesis. *Development*. in revision.
- 697 36. Serre JM, Lucas B, Martin SCT, Heier JA, Shao X, Hardin J. *C. elegans* srGAP is an  
698 alpha-catenin M domain-binding protein that strengthens cadherin-dependent adhesion during  
699 morphogenesis. *Development*. 2022;149(18). Epub 20220920. doi: 10.1242/dev.200775.  
700 PubMed PMID: 36125129.
- 701 37. Guerrier S, Coutinho-Budd J, Sassa T, Gresset A, Jordan NV, Chen K, et al. The F-BAR  
702 domain of srGAP2 induces membrane protrusions required for neuronal migration and  
703 morphogenesis. *Cell*. 2009;138(5):990-1004. doi: 10.1016/j.cell.2009.06.047. PubMed PMID:  
704 19737524; PubMed Central PMCID: PMCPMC2797480.



- 705 38. Endris V, Haussmann L, Buss E, Bacon C, Bartsch D, Rappold G. SrGAP3 interacts with  
706 lamellipodin at the cell membrane and regulates Rac-dependent cellular protrusions. *J Cell Sci.*  
707 2011;124(Pt 23):3941-55. Epub 20111208. doi: 10.1242/jcs.077081. PubMed PMID: 22159416.
- 708 39. Lucas B, Hardin J. Mind the (sr)GAP - roles of Slit-Robo GAPs in neurons, brains and  
709 beyond. *J Cell Sci.* 2017;130(23):3965-74. Epub 20171102. doi: 10.1242/jcs.207456. PubMed  
710 PMID: 29097383; PubMed Central PMCID: PMC5769592.
- 711 40. Endris V, Wogatzky B, Leimer U, Bartsch D, Zatyka M, Latif F, et al. The novel Rho-  
712 GTPase activating gene MEGAP/ srGAP3 has a putative role in severe mental retardation. *Proc*  
713 *Natl Acad Sci U S A.* 2002;99(18):11754-9. Epub 20020823. doi: 10.1073/pnas.162241099.  
714 PubMed PMID: 12195014; PubMed Central PMCID: PMC129341.
- 715 41. Wong K, Ren X-R, Huang Y-Z, Xie Y, Liu G, Saito H, et al. Signal Transduction in  
716 Neuronal Migration. *Cell.* 2001;107(2):209-21. doi: 10.1016/s0092-8674(01)00530-x.
- 717 42. Foletta VC, Brown FD, Scott Young Iii W. Cloning of rat ARHGAP4/C1, a RhoGAP  
718 family member expressed in the nervous system that colocalizes with the Golgi complex and  
719 microtubules. *Molecular Brain Research.* 2002;107(1):65-79. doi: 10.1016/s0169-  
720 328x(02)00448-5.
- 721 43. Katoh M, Katoh M. Identification and characterization of human FCHSD1 and FCHSD2  
722 genes in silico. *International Journal of Molecular Medicine.* 2004. doi: 10.3892/ijmm.13.5.749.
- 723 44. Fotopoulos N, Wernike D, Chen Y, Makil N, Marte A, Piekny A. *Caenorhabditis elegans*  
724 anillin (ani-1) regulates neuroblast cytokinesis and epidermal morphogenesis during embryonic  
725 development. *Dev Biol.* 2013;383(1):61-74. Epub 20130907. doi: 10.1016/j.ydbio.2013.08.024.  
726 PubMed PMID: 24016757.
- 727 45. Neukomm LJ, Zeng S, Frei AP, Huegli PA, Hengartner MO. Small GTPase CDC-42  
728 promotes apoptotic cell corpse clearance in response to PAT-2 and CED-1 in *C. elegans*. *Cell*  
729 *Death Differ.* 2014;21(6):845-53. Epub 20140314. doi: 10.1038/cdd.2014.23. PubMed PMID:  
730 24632947; PubMed Central PMCID: PMC4013519.
- 731 46. Barrett T, Xiao B, Dodson EJ, Dodson G, Ludbrook SB, Nurmahomed K, et al. The  
732 structure of the GTPase-activating domain from p50rhoGAP. *Nature.* 1997;385(6615):458-61.  
733 doi: 10.1038/385458a0. PubMed PMID: 9009196.
- 734 47. Kang H, Bang I, Jin KS, Lee B, Lee J, Shao X, et al. Structural and functional  
735 characterization of *Caenorhabditis elegans* alpha-catenin reveals constitutive binding to beta-  
736 catenin and F-actin. *J Biol Chem.* 2017;292(17):7077-86. Epub 20170315. doi:  
737 10.1074/jbc.M116.769778. PubMed PMID: 28298447; PubMed Central PMCID:  
738 PMC5409474.
- 739 48. Pang SM, Le S, Kwiatkowski AV, Yan J. Mechanical stability of alphaT-catenin and its  
740 activation by force for vinculin binding. *Mol Biol Cell.* 2019;30(16):1930-7. Epub 20190718.  
741 doi: 10.1091/mbc.E19-02-0102. PubMed PMID: 31318313; PubMed Central PMCID:  
742 PMC6727763.
- 743 49. Seddiki R, Narayana G, Strale PO, Balcioglu HE, Peyret G, Yao M, et al. Force-  
744 dependent binding of vinculin to alpha-catenin regulates cell-cell contact stability and collective  
745 cell behavior. *Mol Biol Cell.* 2018;29(4):380-8. Epub 20171227. doi: 10.1091/mbc.E17-04-0231.  
746 PubMed PMID: 29282282; PubMed Central PMCID: PMC6014167.
- 747 50. Ishiyama N, Sarpal R, Wood MN, Barrick SK, Nishikawa T, Hayashi H, et al. Force-  
748 dependent allostery of the alpha-catenin actin-binding domain controls adherens junction  
749 dynamics and functions. *Nat Commun.* 2018;9(1):5121. Epub 20181130. doi: 10.1038/s41467-  
750 018-07481-7. PubMed PMID: 30504777; PubMed Central PMCID: PMC6269467.

- 751 51. Barrick S, Li J, Kong X, Ray A, Tajkhorshid E, Leckband D. Salt bridges gate alpha-  
752 catenin activation at intercellular junctions. *Mol Biol Cell*. 2018;29(2):111-22. Epub 20171115.  
753 doi: 10.1091/mbc.E17-03-0168. PubMed PMID: 29142072; PubMed Central PMCID:  
754 PMCPMC5909925.
- 755 52. Yao M, Qiu W, Liu R, Efremov AK, Cong P, Seddiki R, et al. Force-dependent  
756 conformational switch of alpha-catenin controls vinculin binding. *Nat Commun*. 2014;5:4525.  
757 Epub 20140731. doi: 10.1038/ncomms5525. PubMed PMID: 25077739.
- 758 53. Yonemura S, Wada Y, Watanabe T, Nagafuchi A, Shibata M. alpha-Catenin as a tension  
759 transducer that induces adherens junction development. *Nat Cell Biol*. 2010;12(6):533-42. Epub  
760 20100509. doi: 10.1038/ncb2055. PubMed PMID: 20453849.
- 761 54. Sakakibara S, Mizutani K, Sugiura A, Sakane A, Sasaki T, Yonemura S, et al. Afadin  
762 regulates actomyosin organization through alphaE-catenin at adherens junctions. *J Cell Biol*.  
763 2020;219(5). doi: 10.1083/jcb.201907079. PubMed PMID: 32227204; PubMed Central PMCID:  
764 PMCPMC7199863.
- 765 55. Maiden SL, Hardin J. The secret life of alpha-catenin: moonlighting in morphogenesis. *J*  
766 *Cell Biol*. 2011;195(4):543-52. doi: 10.1083/jcb.201103106. PubMed PMID: 22084304;  
767 PubMed Central PMCID: PMCPMC3257527.
- 768 56. Pettitt J, Cox EA, Broadbent ID, Flett A, Hardin J. The *Caenorhabditis elegans* p120  
769 catenin homologue, JAC-1, modulates cadherin-catenin function during epidermal  
770 morphogenesis. *J Cell Biol*. 2003;162(1):15-22. doi: 10.1083/jcb.200212136. PubMed PMID:  
771 12847081; PubMed Central PMCID: PMCPMC2172718.
- 772 57. Lynch AM, Grana T, Cox-Paulson E, Couthier A, Cameron M, Chin-Sang I, et al. A  
773 genome-wide functional screen shows MAGI-1 is an L1CAM-dependent stabilizer of apical  
774 junctions in *C. elegans*. *Curr Biol*. 2012;22(20):1891-9. Epub 20120913. doi:  
775 10.1016/j.cub.2012.08.024. PubMed PMID: 22981773; PubMed Central PMCID:  
776 PMCPMC3482306.
- 777 58. Xu XP, Pokutta S, Torres M, Swift MF, Hanein D, Volkmann N, et al. Structural basis of  
778 alphaE-catenin-F-actin catch bond behavior. *Elife*. 2020;9. Epub 20200911. doi:  
779 10.7554/eLife.60878. PubMed PMID: 32915141; PubMed Central PMCID: PMCPMC7588230.
- 780 59. Li J, Newhall J, Ishiyama N, Gottardi C, Ikura M, Leckband DE, et al. Structural  
781 Determinants of the Mechanical Stability of alpha-Catenin. *J Biol Chem*. 2015;290(31):18890-  
782 903. Epub 20150612. doi: 10.1074/jbc.M115.647941. PubMed PMID: 26070562; PubMed  
783 Central PMCID: PMCPMC4521009.
- 784 60. Terekhova K, Pokutta S, Kee YS, Li J, Tajkhorshid E, Fuller G, et al. Binding partner-  
785 and force-promoted changes in alphaE-catenin conformation probed by native cysteine labeling.  
786 *Sci Rep*. 2019;9(1):15375. Epub 20191025. doi: 10.1038/s41598-019-51816-3. PubMed PMID:  
787 31653927; PubMed Central PMCID: PMCPMC6814714.
- 788 61. Barstead RJ, Waterston RH. The basal component of the nematode dense-body is  
789 vinculin. *Journal of Biological Chemistry*. 1989;264(17):10177-85. doi: 10.1016/s0021-  
790 9258(18)81782-3.
- 791 62. Lecroisey C, Brouilly N, Qadota H, Mariol MC, Rochette NC, Martin E, et al. ZYX-1,  
792 the unique zyxin protein of *Caenorhabditis elegans*, is involved in dystrophin-dependent muscle  
793 degeneration. *Mol Biol Cell*. 2013;24(8):1232-49. Epub 20130220. doi: 10.1091/mbc.E12-09-  
794 0679. PubMed PMID: 23427270; PubMed Central PMCID: PMCPMC3623643.
- 795 63. Liu Q, Jones TI, Bachmann RA, Meghpara M, Rogowski L, Williams BD, et al. *C.*  
796 *elegans* PAT-9 is a nuclear zinc finger protein critical for the assembly of muscle attachments.



- 797 Cell Biosci. 2012;2(1):18. Epub 20120522. doi: 10.1186/2045-3701-2-18. PubMed PMID:  
798 22616817; PubMed Central PMCID: PMCPMC3419604.
- 799 64. Tachibana K, Nakanishi H, Mandai K, Ozaki K, Ikeda W, Yamamoto Y, et al. Two cell  
800 adhesion molecules, nectin and cadherin, interact through their cytoplasmic domain-associated  
801 proteins. J Cell Biol. 2000;150(5):1161-76. doi: 10.1083/jcb.150.5.1161. PubMed PMID:  
802 10974003; PubMed Central PMCID: PMCPMC2175253.
- 803 65. Pokutta S, Drees F, Takai Y, Nelson WJ, Weis WI. Biochemical and structural definition  
804 of the I-afadin- and actin-binding sites of alpha-catenin. J Biol Chem. 2002;277(21):18868-74.  
805 Epub 20020320. doi: 10.1074/jbc.M201463200. PubMed PMID: 11907041; PubMed Central  
806 PMCID: PMCPMC3368618.
- 807 66. Schmidt A, Lv Z, Grosshans J. ELMO and Sponge specify subapical restriction of Canoe  
808 and formation of the subapical domain in early Drosophila embryos. Development. 2018;145(2).  
809 Epub 20180126. doi: 10.1242/dev.157909. PubMed PMID: 29361564.
- 810 67. Manning LA, Perez-Vale KZ, Schaefer KN, Sewell MT, Peifer M. The Drosophila  
811 Afadin and ZO-1 homologues Canoe and Polychaetoid act in parallel to maintain epithelial  
812 integrity when challenged by adherens junction remodeling. Mol Biol Cell. 2019;30(16):1938-  
813 60. Epub 20190612. doi: 10.1091/mbc.E19-04-0209. PubMed PMID: 31188739; PubMed  
814 Central PMCID: PMCPMC6727765.
- 815 68. Walther RF, Burki M, Pinal N, Rogerson C, Pichaud F. Rap1, Canoe and Mbt cooperate  
816 with Bazooka to promote zonula adherens assembly in the fly photoreceptor. J Cell Sci.  
817 2018;131(6). Epub 20180326. doi: 10.1242/jcs.207779. PubMed PMID: 29507112; PubMed  
818 Central PMCID: PMCPMC5897711.
- 819 69. Slovakova J, Speicher S, Sanchez-Soriano N, Prokop A, Carmena A. The actin-binding  
820 protein Canoe/AF-6 forms a complex with Robo and is required for Slit-Robo signaling during  
821 axon pathfinding at the CNS midline. J Neurosci. 2012;32(29):10035-44. doi:  
822 10.1523/JNEUROSCI.6342-11.2012. PubMed PMID: 22815517; PubMed Central PMCID:  
823 PMCPMC6621277.
- 824 70. Ma Z, Li P, Hu X, Song H. Polarity protein Canoe mediates overproliferation via  
825 modulation of JNK, Ras-MAPK and Hippo signalling. Cell Prolif. 2019;52(1):e12529. Epub  
826 20181017. doi: 10.1111/cpr.12529. PubMed PMID: 30328653; PubMed Central PMCID:  
827 PMCPMC6430484.
- 828 71. Matsuo T, Takahashi K, Kondo S, Kaibuchi K, Yamamoto D. Regulation of cone cell  
829 formation by Canoe and Ras in the developing Drosophila eye. Development.  
830 1997;124(14):2671-80. doi: 10.1242/dev.124.14.2671. PubMed PMID: 9226438.
- 831 72. Callaci S, Morrison K, Shao X, Schuh AL, Wang Y, Yates JR, 3rd, et al.  
832 Phosphoregulation of the C. elegans cadherin-catenin complex. Biochem J. 2015;472(3):339-52.  
833 Epub 20151006. doi: 10.1042/BJ20150410. PubMed PMID: 26443865; PubMed Central  
834 PMCID: PMCPMC4663164.
- 835 73. Raich WB, Agbunag C, Hardin J. Rapid epithelial-sheet sealing in the Caenorhabditis  
836 elegans embryo requires cadherin-dependent filopodial priming. Curr Biol. 1999;9(20):1139-46.  
837 doi: 10.1016/S0960-9822(00)80015-9. PubMed PMID: 10531027.
- 838 74. Mitchell SJ, Rosenblatt J. Early mechanical selection of cell extrusion and extrusion  
839 signaling in cancer. Curr Opin Cell Biol. 2021;72:36-40. Epub 20210524. doi:  
840 10.1016/j.ceb.2021.04.005. PubMed PMID: 34034216; PubMed Central PMCID:  
841 PMCPMC8869604.

- 842 75. Tada M. The morphogenetic changes that lead to cell extrusion in development and cell  
843 competition. *Dev Biol.* 2021;477:1-10. Epub 20210511. doi: 10.1016/j.ydbio.2021.05.003.  
844 PubMed PMID: 33984304.
- 845 76. Villars A, Levayer R. Collective effects in epithelial cell death and cell extrusion. *Curr*  
846 *Opin Genet Dev.* 2022;72:8-14. Epub 20211006. doi: 10.1016/j.gde.2021.09.004. PubMed  
847 PMID: 34626896.
- 848 77. Harding MJ, McGraw HF, Nechiporuk A. The roles and regulation of multicellular  
849 rosette structures during morphogenesis. *Development.* 2014;141(13):2549-58. doi:  
850 10.1242/dev.101444. PubMed PMID: 24961796; PubMed Central PMCID: PMC4067956.
- 851 78. Chuai M, Weijer CJ. The mechanisms underlying primitive streak formation in the chick  
852 embryo. *Curr Top Dev Biol.* 2008;81:135-56. doi: 10.1016/S0070-2153(07)81004-0. PubMed  
853 PMID: 18023726.
- 854 79. Rozbicki E, Chuai M, Karjalainen AI, Song F, Sang HM, Martin R, et al. Myosin-II-  
855 mediated cell shape changes and cell intercalation contribute to primitive streak formation. *Nat*  
856 *Cell Biol.* 2015;17(4):397-408. doi: 10.1038/ncb3138. PubMed PMID: 25812521; PubMed  
857 Central PMCID: PMC4886837.
- 858 80. Bertet C, Sulak L, Lecuit T. Myosin-dependent junction remodelling controls planar cell  
859 intercalation and axis elongation. *Nature.* 2004;429(6992):667-71. doi: 10.1038/nature02590.  
860 PubMed PMID: 15190355.
- 861 81. Blankenship JT, Backovic ST, Sanny JS, Weitz O, Zallen JA. Multicellular rosette  
862 formation links planar cell polarity to tissue morphogenesis. *Dev Cell.* 2006;11(4):459-70. doi:  
863 10.1016/j.devcel.2006.09.007. PubMed PMID: 17011486.
- 864 82. Saunders LR, McClay DR. Sub-circuits of a gene regulatory network control a  
865 developmental epithelial-mesenchymal transition. *Development.* 2014;141(7):1503-13. Epub  
866 20140305. doi: 10.1242/dev.101436. PubMed PMID: 24598159; PubMed Central PMCID:  
867 PMC3957374.
- 868 83. Miller JR, McClay DR. Changes in the pattern of adherens junction-associated beta-  
869 catenin accompany morphogenesis in the sea urchin embryo. *Dev Biol.* 1997;192(2):310-22. doi:  
870 10.1006/dbio.1997.8739. PubMed PMID: 9441670.
- 871 84. Simoes S, Oh Y, Wang MFZ, Fernandez-Gonzalez R, Tepass U. Myosin II promotes the  
872 anisotropic loss of the apical domain during *Drosophila* neuroblast ingression. *J Cell Biol.*  
873 2017;216(5):1387-404. Epub 20170331. doi: 10.1083/jcb.201608038. PubMed PMID:  
874 28363972; PubMed Central PMCID: PMC5412560.
- 875 85. Shao X, Lucas B, Strauch J, Hardin J. The adhesion modulation domain of  
876 *Caenorhabditis elegans* alpha-catenin regulates actin binding during morphogenesis. *Mol Biol*  
877 *Cell.* 2019;30(17):2115-23. Epub 20190612. doi: 10.1091/mbc.E19-01-0018. PubMed PMID:  
878 31188702; PubMed Central PMCID: PMC6743470.
- 879 86. Maiden SL, Harrison N, Keegan J, Cain B, Lynch AM, Pettitt J, et al. Specific conserved  
880 C-terminal amino acids of *Caenorhabditis elegans* HMP-1/alpha-catenin modulate F-actin  
881 binding independently of vinculin. *J Biol Chem.* 2013;288(8):5694-706. Epub 20121227. doi:  
882 10.1074/jbc.M112.438093. PubMed PMID: 23271732; PubMed Central PMCID:  
883 PMC3581367.
- 884 87. Choi W, Acharya BR, Peyret G, Fardin MA, Mege RM, Ladoux B, et al. Remodeling the  
885 zonula adherens in response to tension and the role of afadin in this response. *J Cell Biol.*  
886 2016;213(2):243-60. doi: 10.1083/jcb.201506115. PubMed PMID: 27114502; PubMed Central  
887 PMCID: PMC45084271.

- 888 88. Sawyer JK, Choi W, Jung KC, He L, Harris NJ, Peifer M. A contractile actomyosin  
889 network linked to adherens junctions by Canoe/afadin helps drive convergent extension. *Mol*  
890 *Biol Cell*. 2011;22(14):2491-508. Epub 20110525. doi: 10.1091/mbc.E11-05-0411. PubMed  
891 PMID: 21613546; PubMed Central PMCID: PMC3135475.
- 892 89. Sawyer JK, Harris NJ, Slep KC, Gaul U, Peifer M. The *Drosophila* afadin homologue  
893 Canoe regulates linkage of the actin cytoskeleton to adherens junctions during apical  
894 constriction. *J Cell Biol*. 2009;186(1):57-73. doi: 10.1083/jcb.200904001. PubMed PMID:  
895 19596848; PubMed Central PMCID: PMC2712996.
- 896 90. Yu HH, Zallen JA. Abl and Canoe/Afadin mediate mechanotransduction at tricellular  
897 junctions. *Science*. 2020;370(6520). doi: 10.1126/science.aba5528. PubMed PMID: 33243859;  
898 PubMed Central PMCID: PMC8559527.
- 899 91. Edelstein A, Amodaj N, Hoover K, Vale R, Stuurman N. Computer control of  
900 microscopes using microManager. *Curr Protoc Mol Biol*. 2010;Chapter 14:Unit14 20. Epub  
901 2010/10/05. doi: 10.1002/0471142727.mb1420s92. PubMed PMID: 20890901; PubMed Central  
902 PMCID: PMC3065365.
- 903 92. Edelstein AD, Tsuchida MA, Amodaj N, Pinkard H, Vale RD, Stuurman N. Advanced  
904 methods of microscope control using  $\mu$ Manager software. *Journal of Biological Methods*.  
905 2014;1(2):10. doi: 10.14440/jbm.2014.36.
- 906 93. Dickinson DJ, Goldstein B. CRISPR-based methods for *Caenorhabditis elegans* genome  
907 engineering. *Genetics*. 2016;202(3):885-901. doi: 10.1534/genetics.115.182162. PubMed PMID:  
908 26953268; PubMed Central PMCID: PMC4788126.
- 909 94. Schwartz ML, Jorgensen EM. SapTrap, a Toolkit for High-Throughput CRISPR/Cas9  
910 Gene Modification in *Caenorhabditis elegans*. *Genetics*. 2016;202(4):1277-88. Epub 2016/02/04.  
911 doi: 10.1534/genetics.115.184275. PubMed PMID: 26837755; PubMed Central PMCID:  
912 PMC4905529.
- 913 95. Arribere JA, Bell RT, Fu BX, Artiles KL, Hartman PS, Fire AZ. Efficient marker-free  
914 recovery of custom genetic modifications with CRISPR/Cas9 in *Caenorhabditis elegans*.  
915 *Genetics*. 2014;198(3):837-46. Epub 2014/08/28. doi: 10.1534/genetics.114.169730. PubMed  
916 PMID: 25161212; PubMed Central PMCID: PMC4224173.
- 917 96. Kamath RS, Ahringer J. Genome-wide RNAi screening in *Caenorhabditis elegans*.  
918 *Methods*. 2003;30(4):313-21. doi: 10.1016/s1046-2023(03)00050-1. PubMed PMID: 12828945.  
919

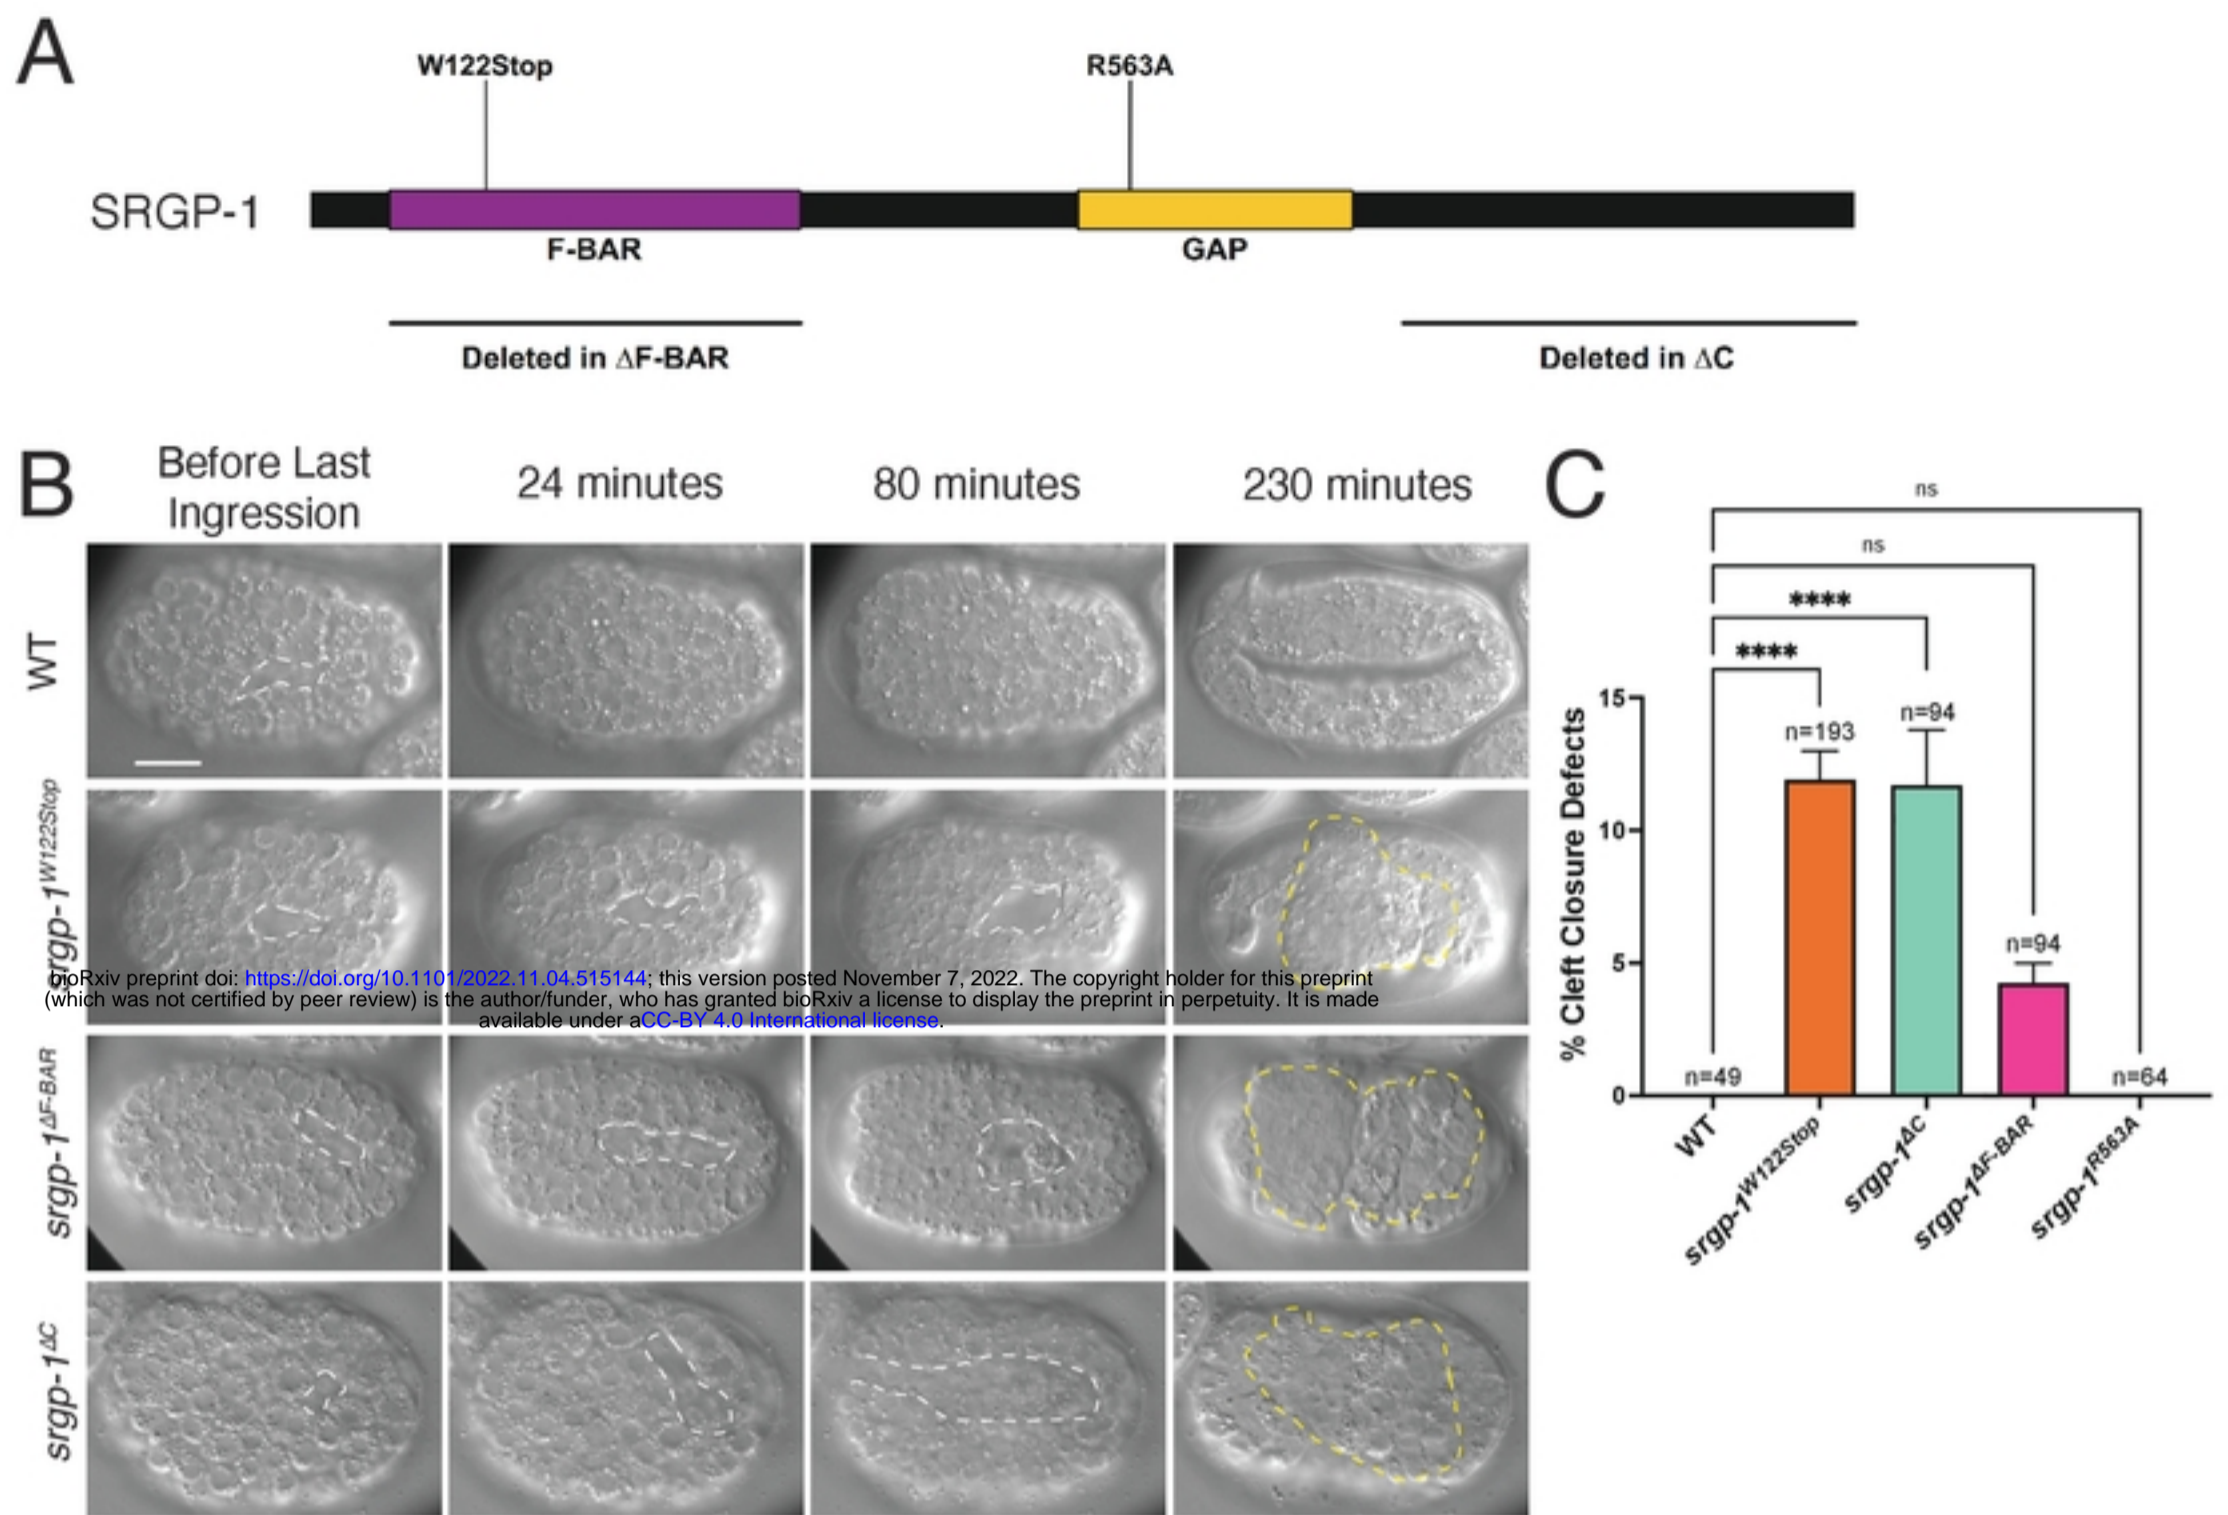

Figure 1



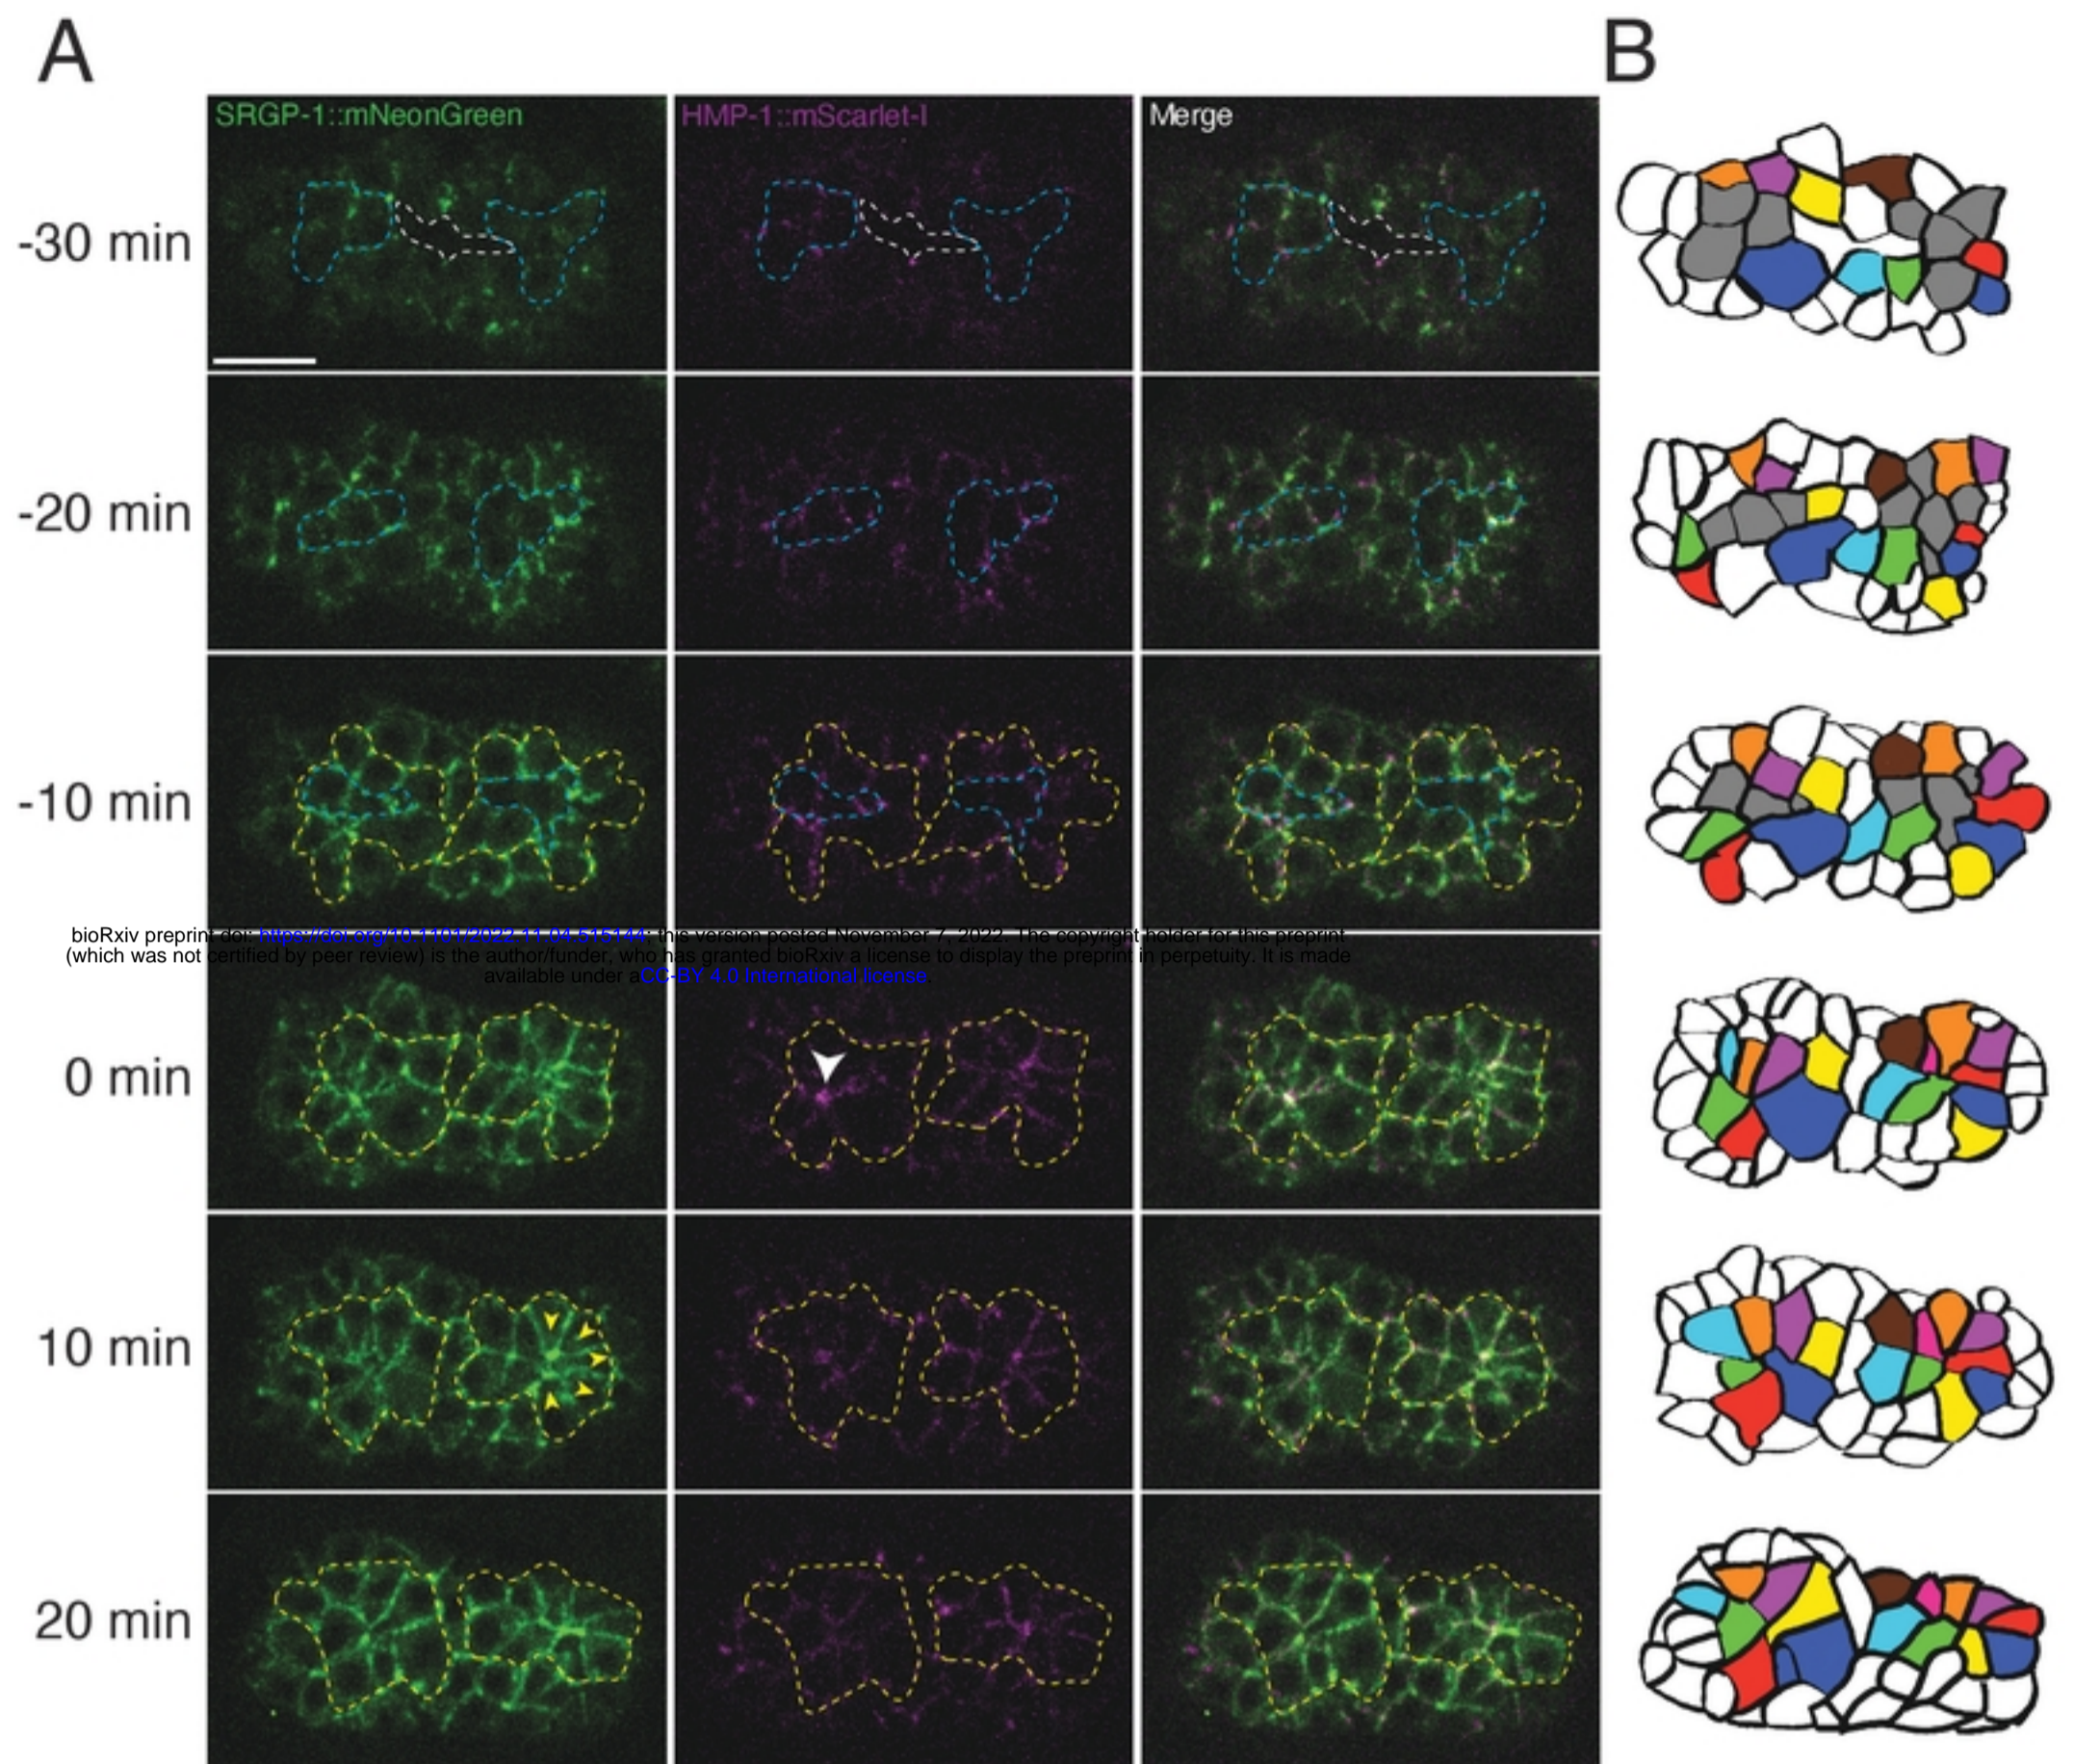

Figure 2



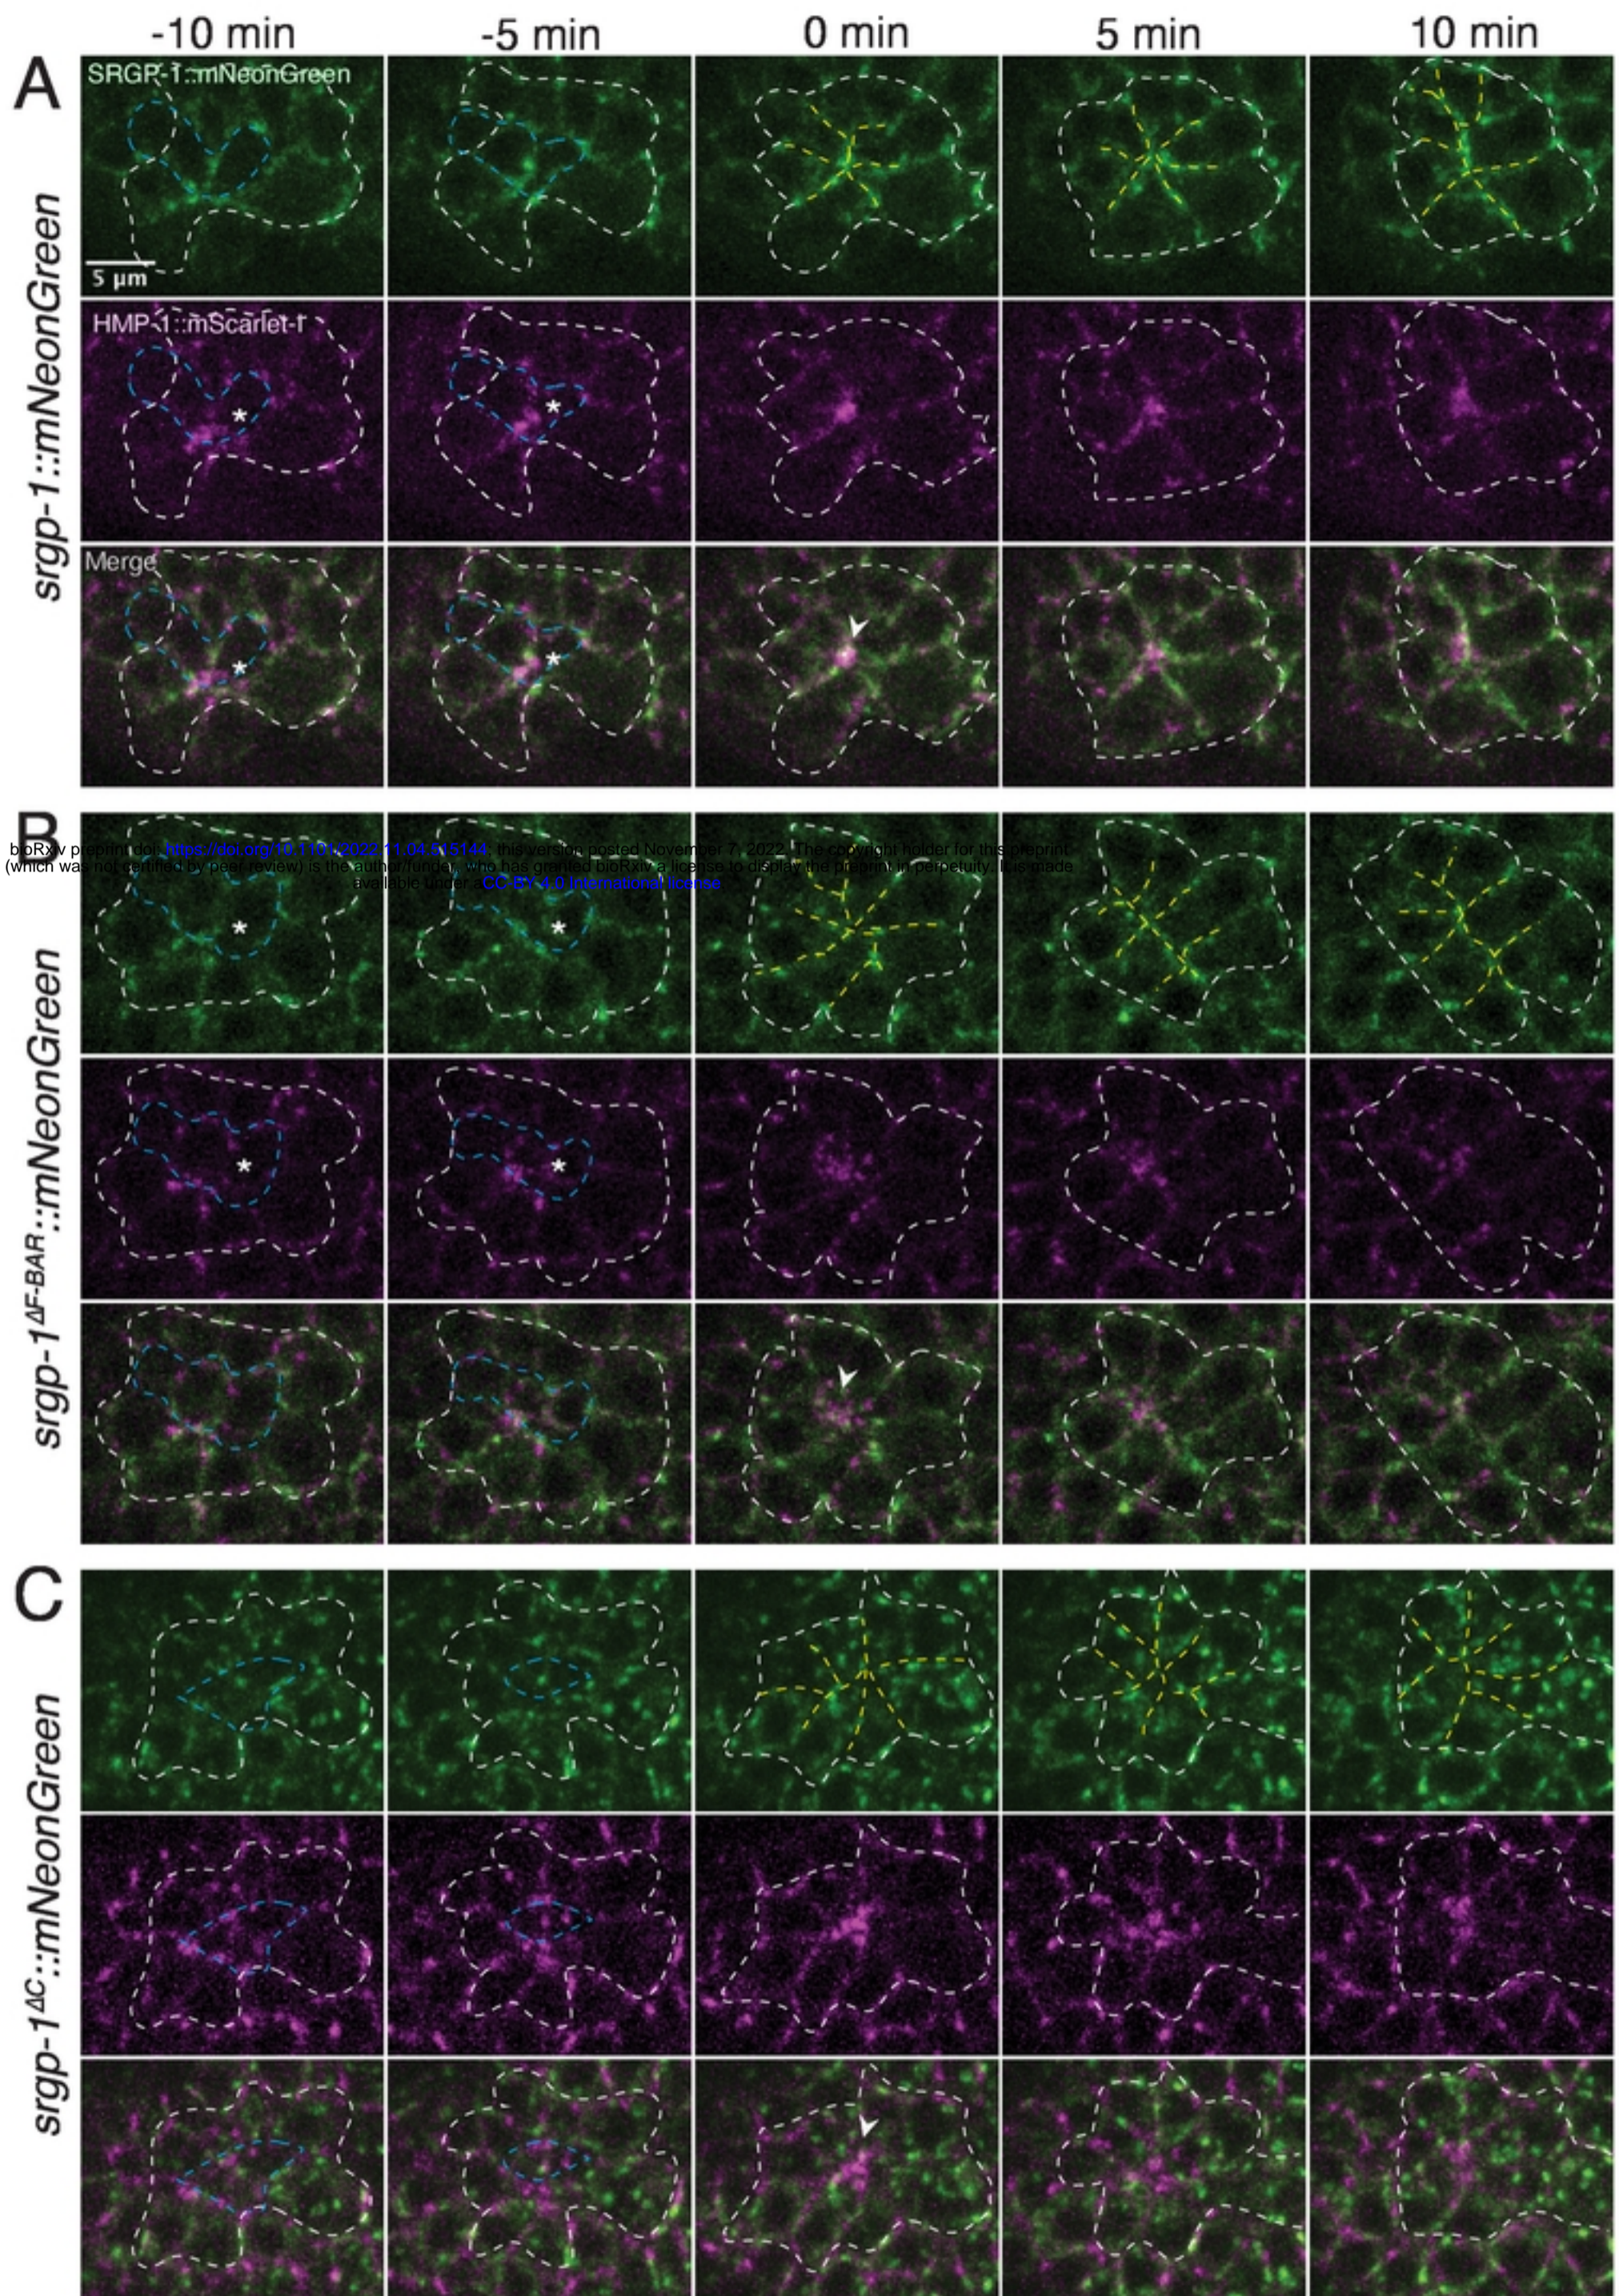

Figure 3



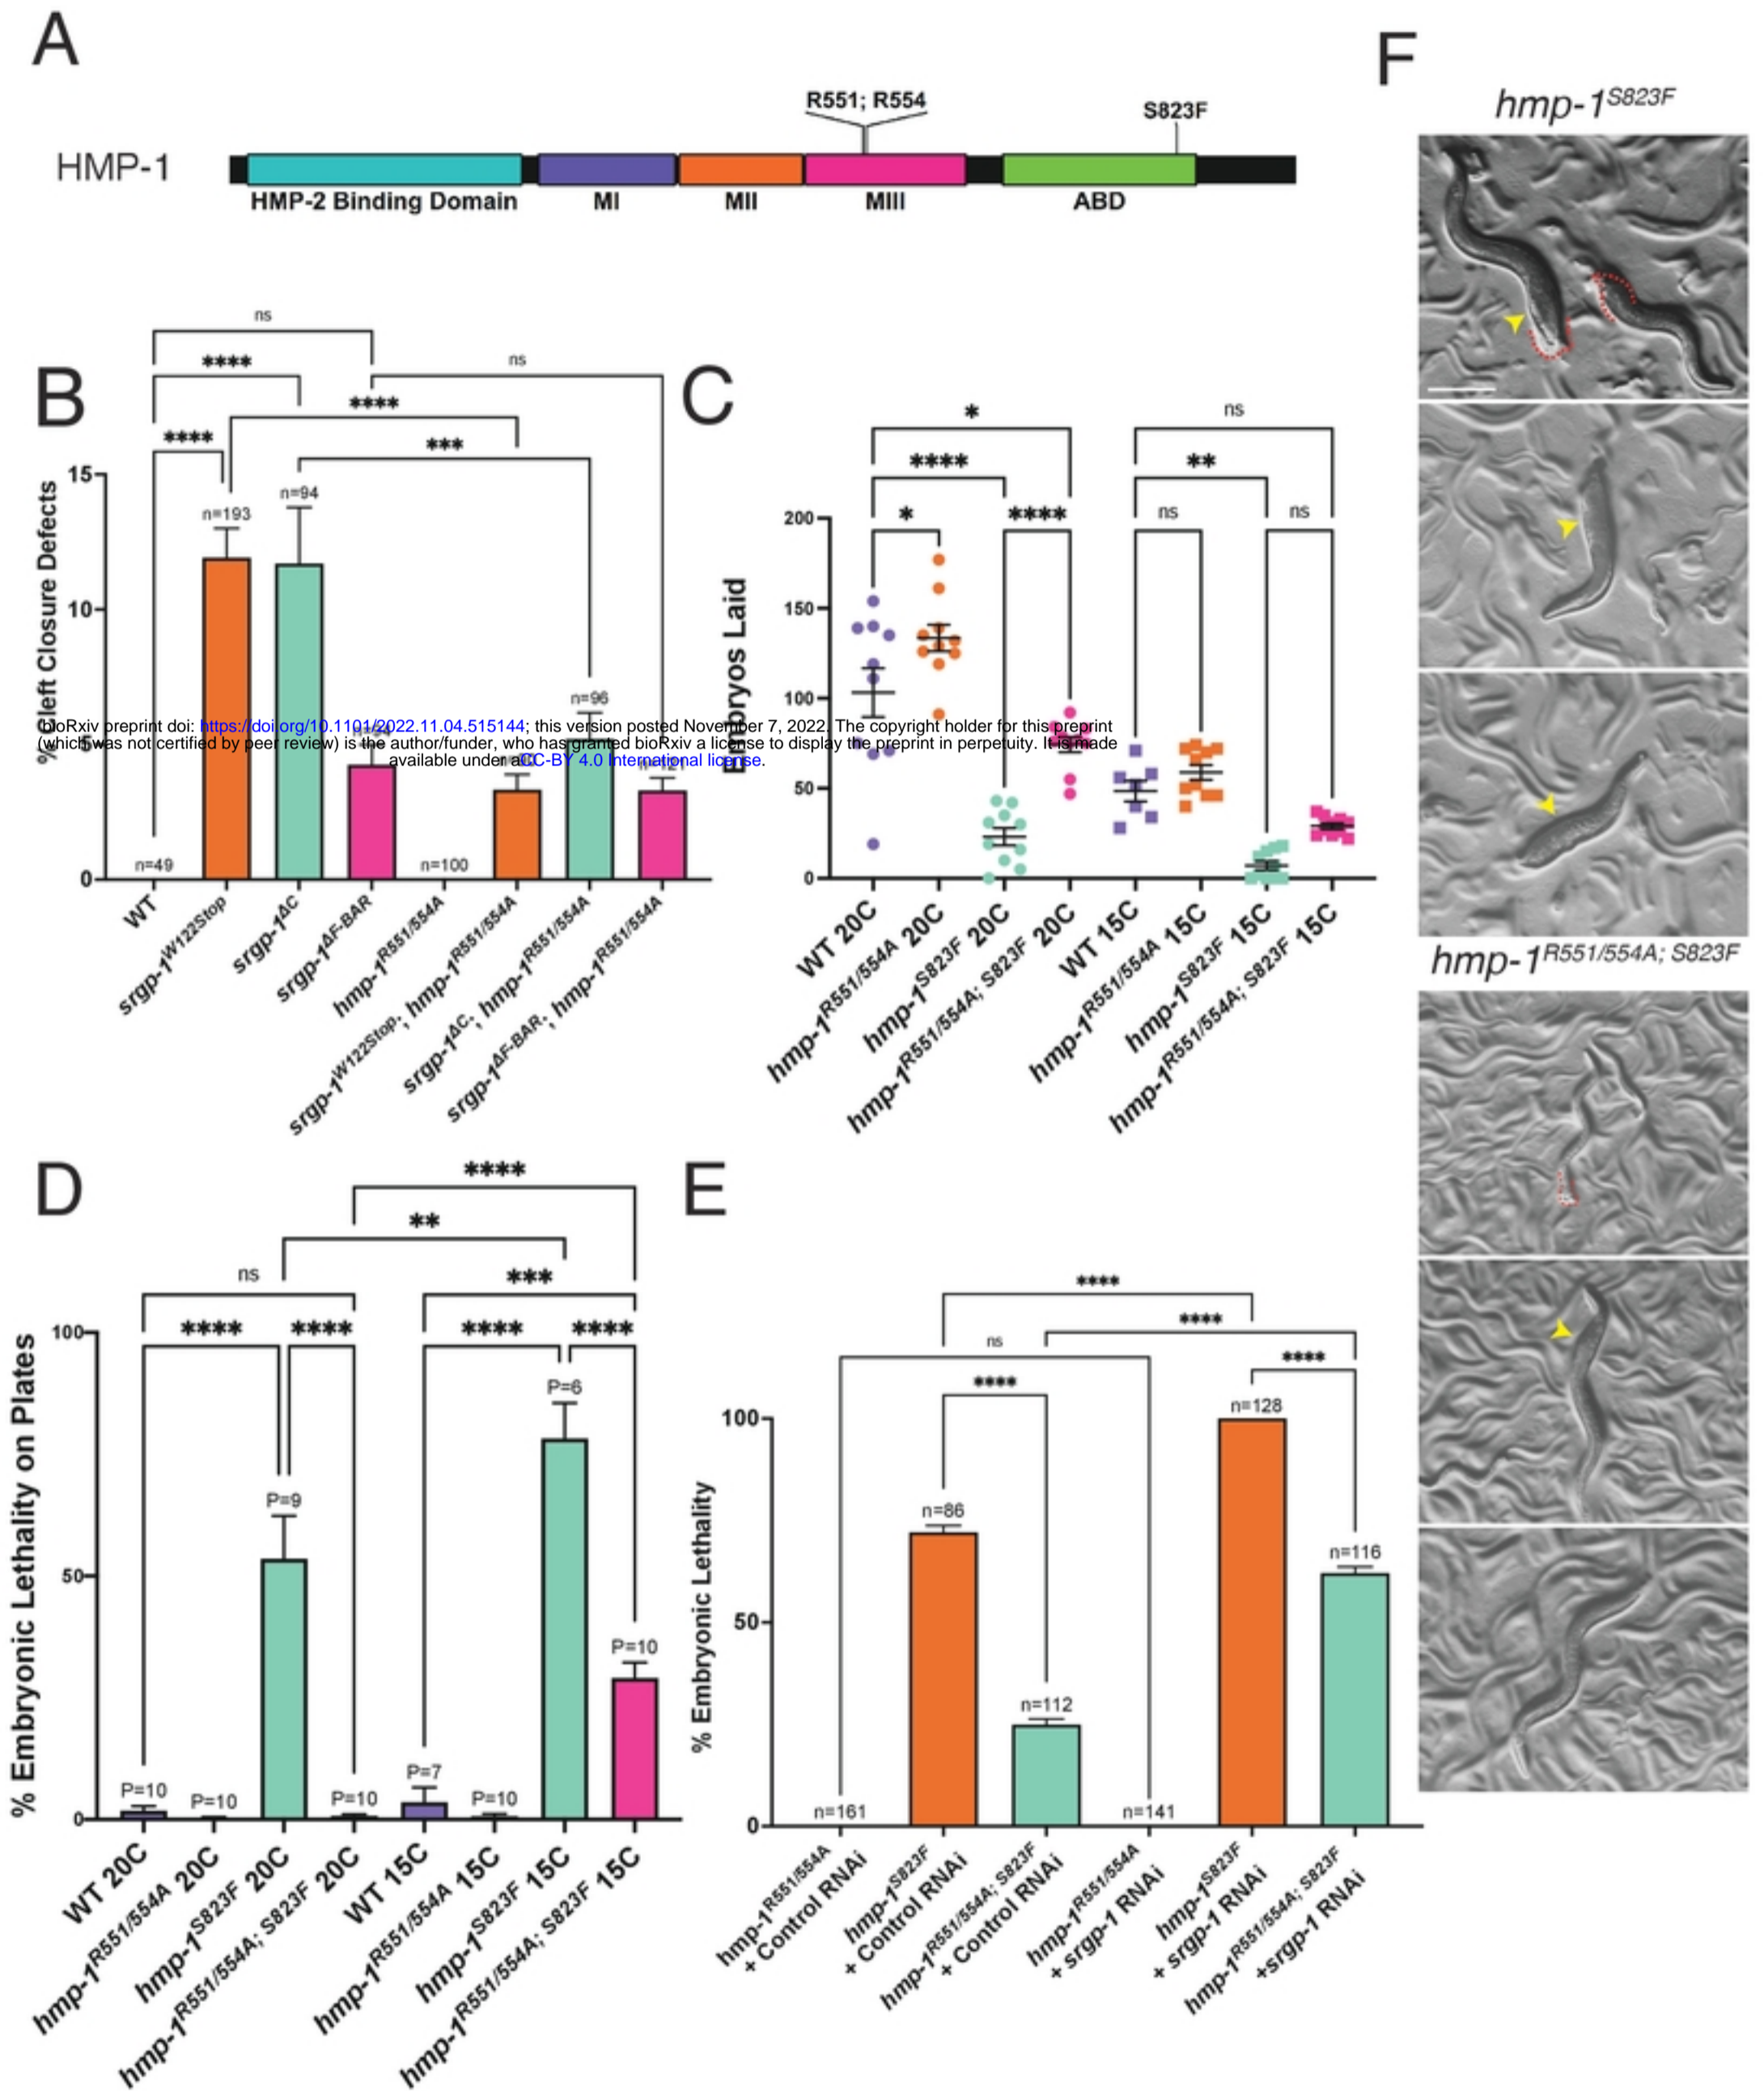

Figure 4

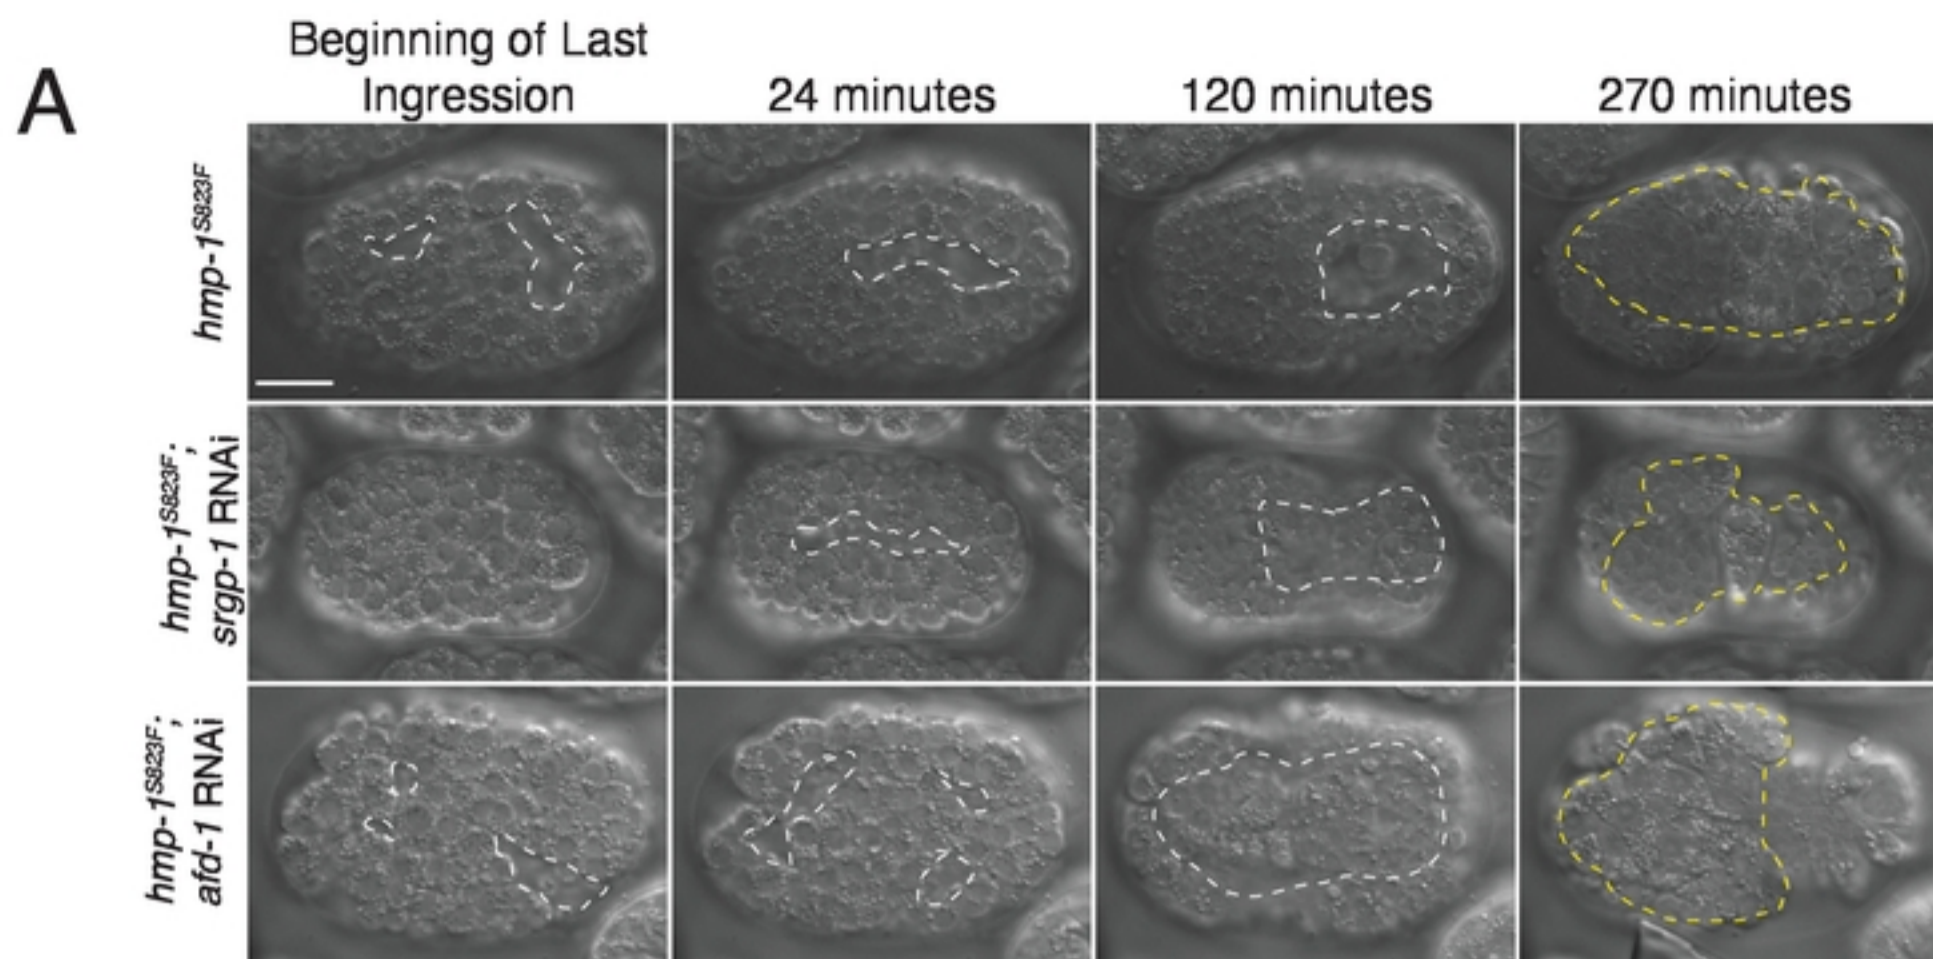

bioRxiv preprint doi: <https://doi.org/10.1101/2022.11.04.515144>; this version posted November 7, 2022. The copyright holder for this preprint (which was not certified by peer review) is the author/funder, who has granted bioRxiv a license to display the preprint in perpetuity. It is made available under aCC-BY 4.0 International license.

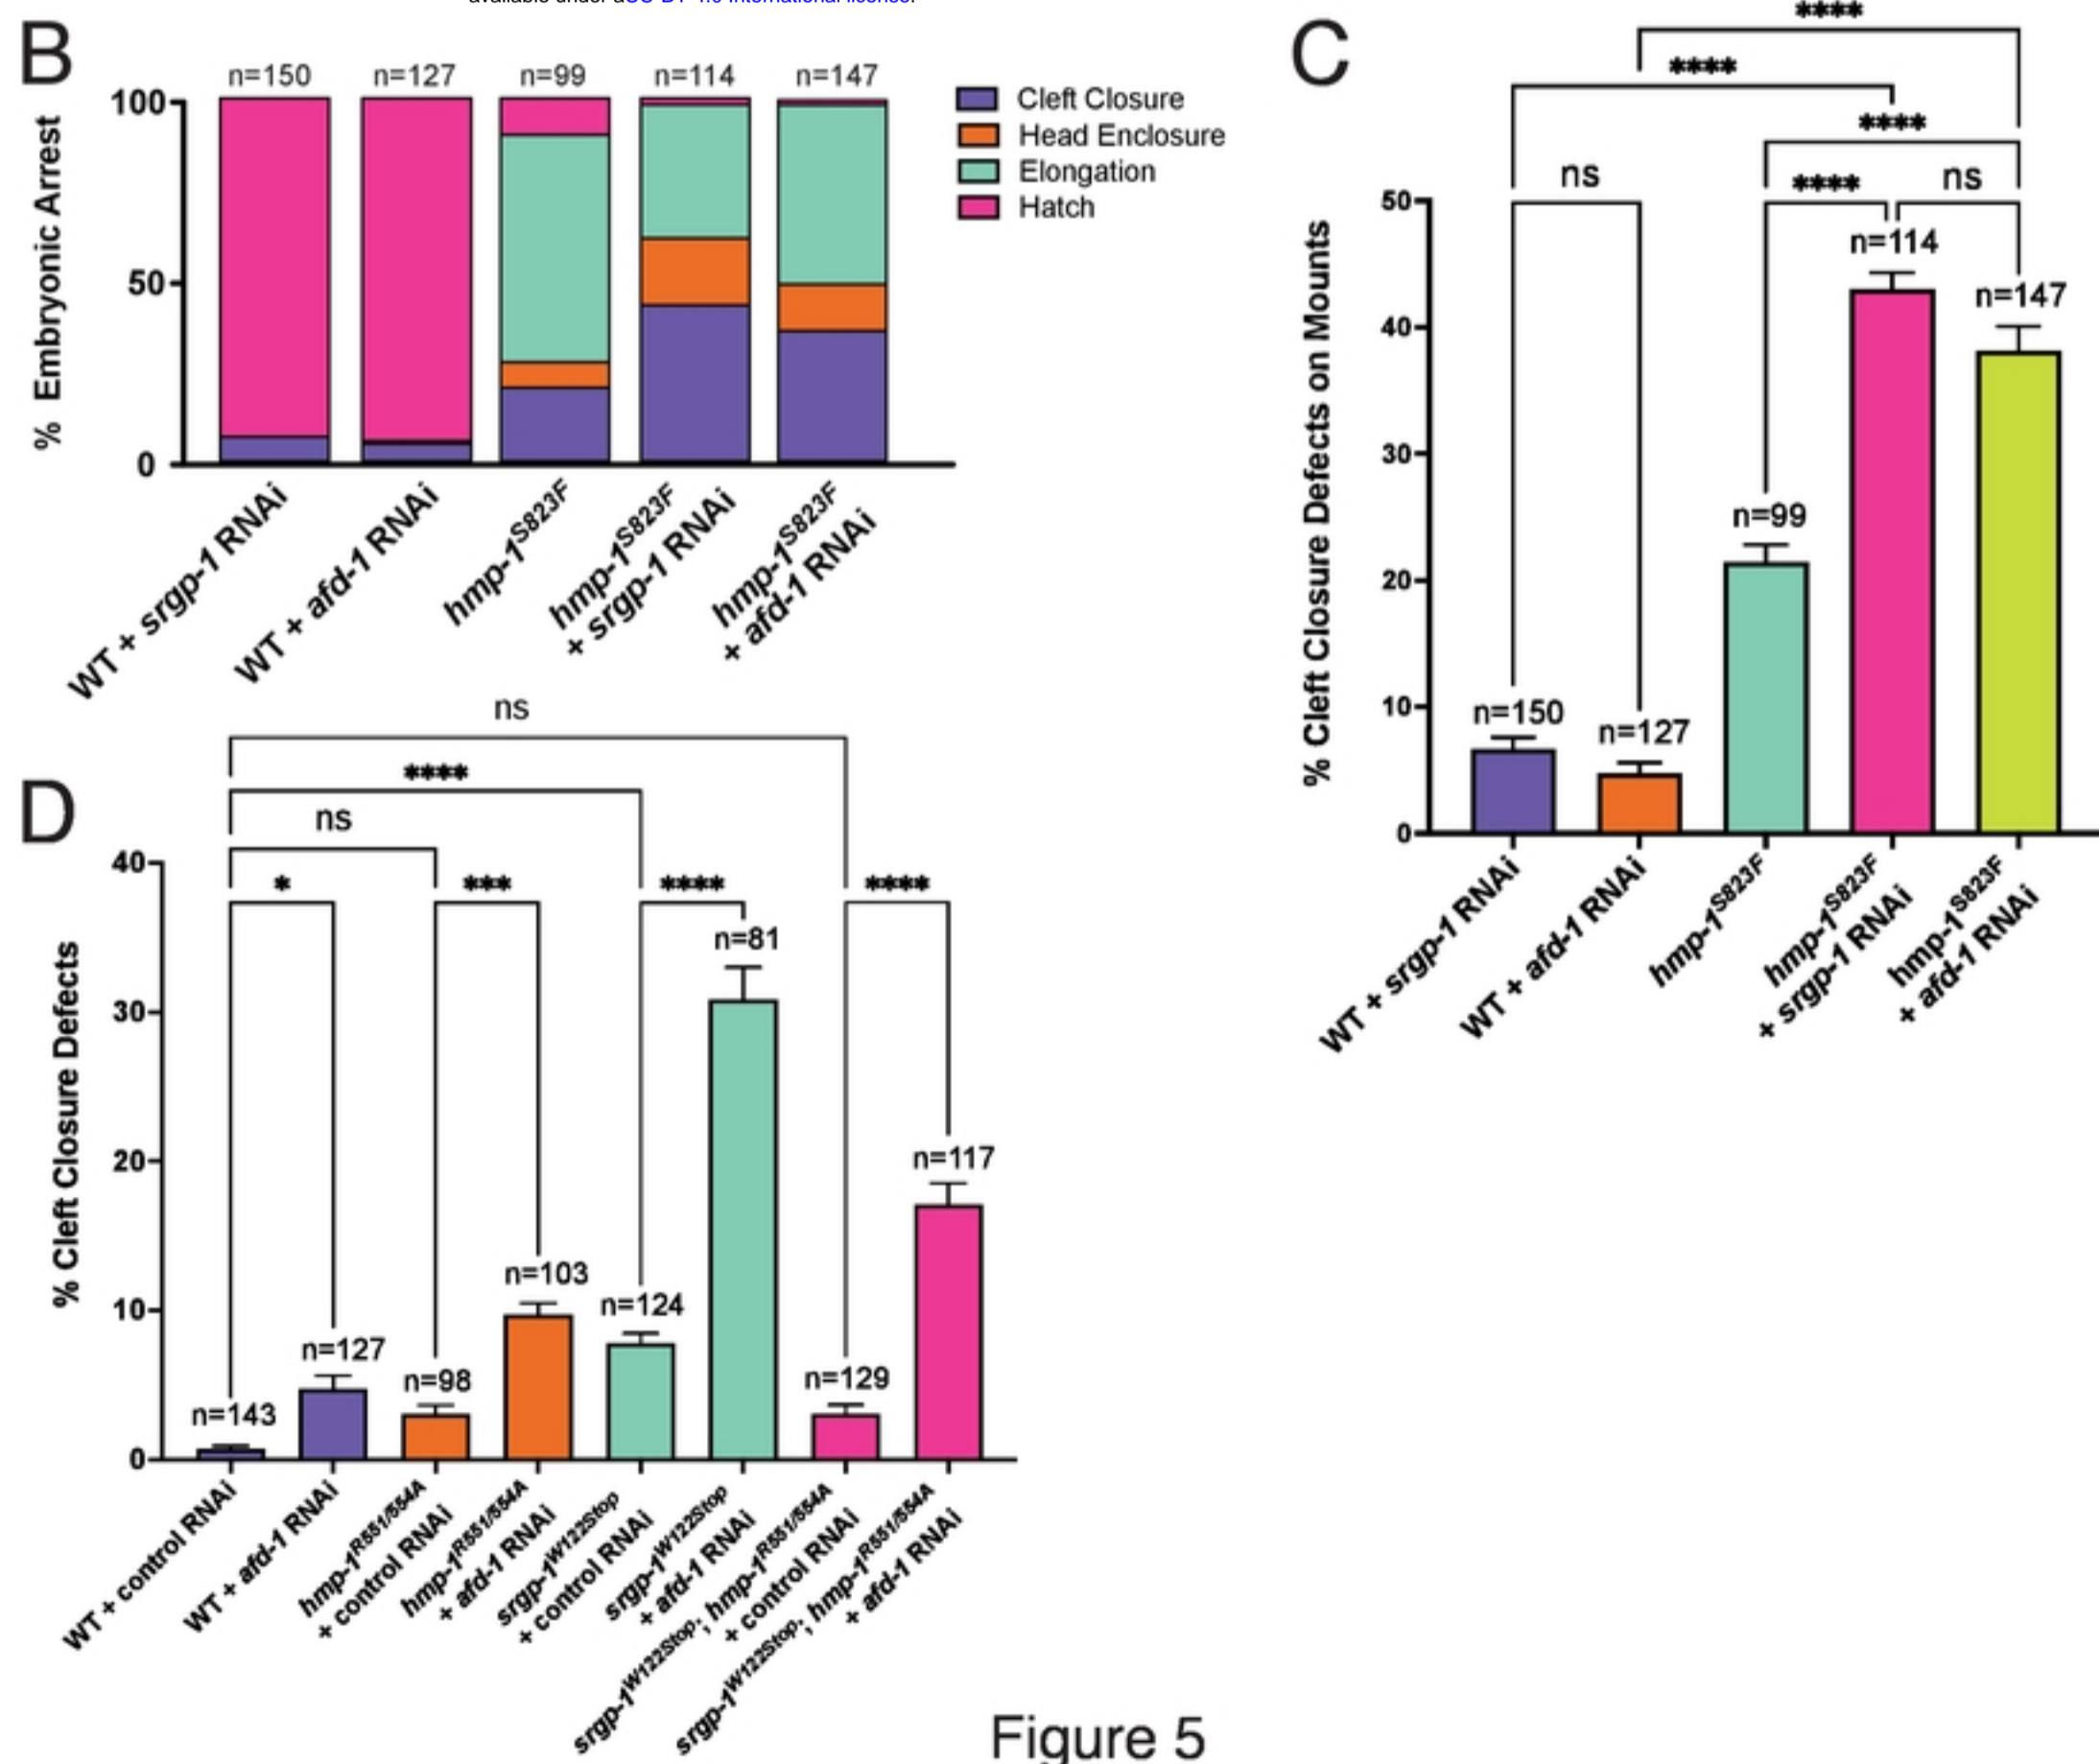

Figure 5



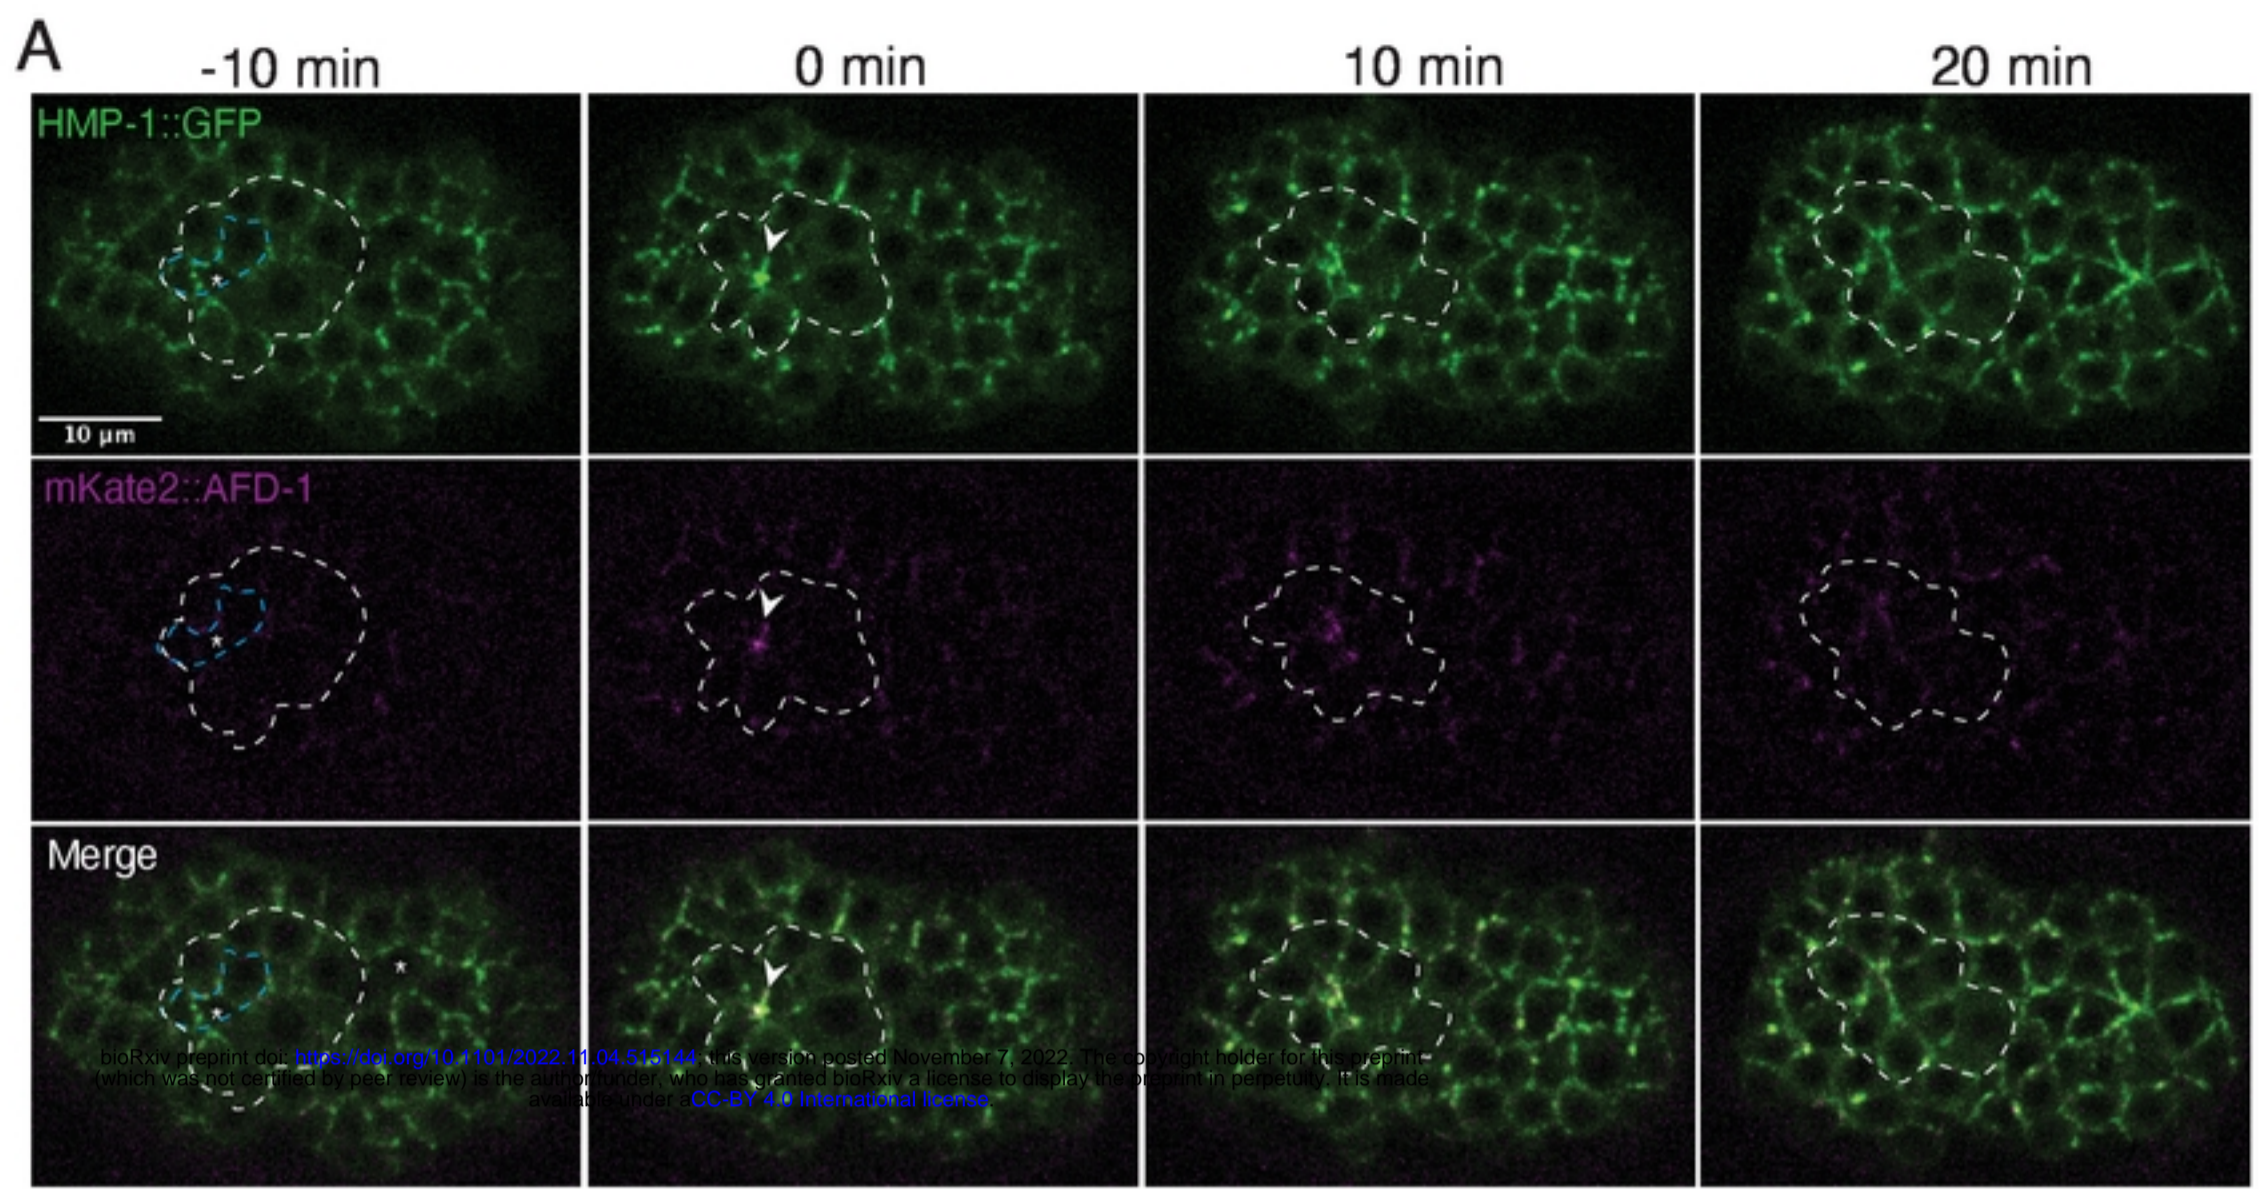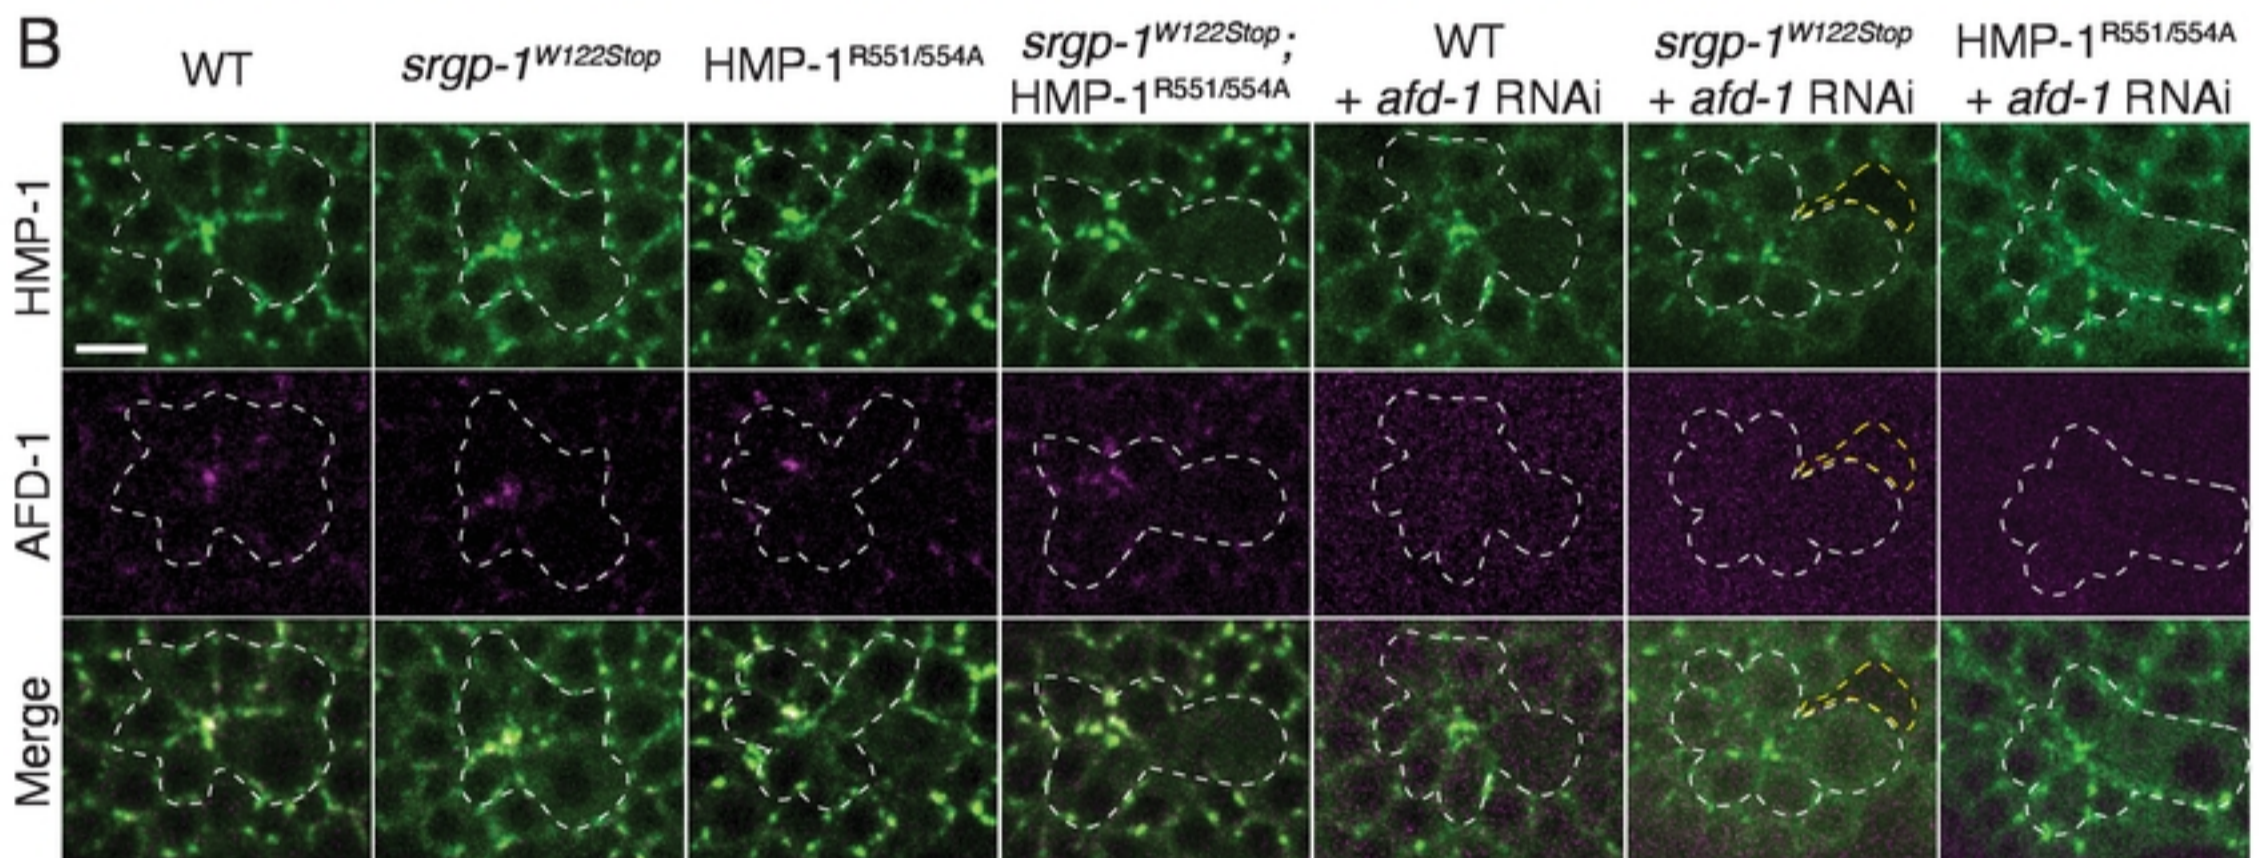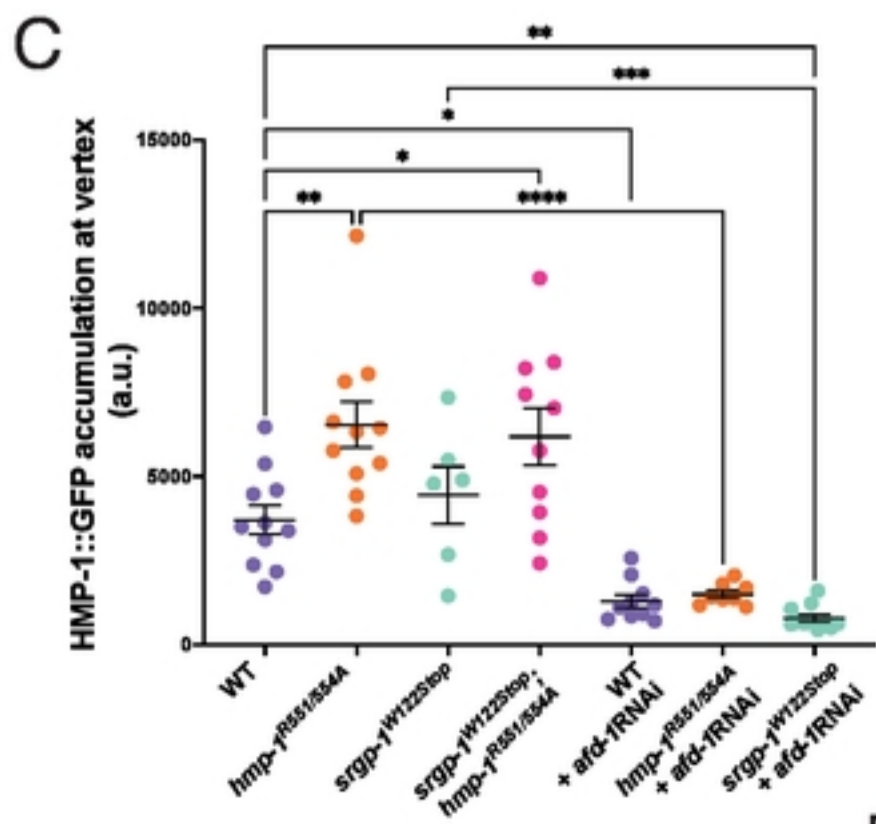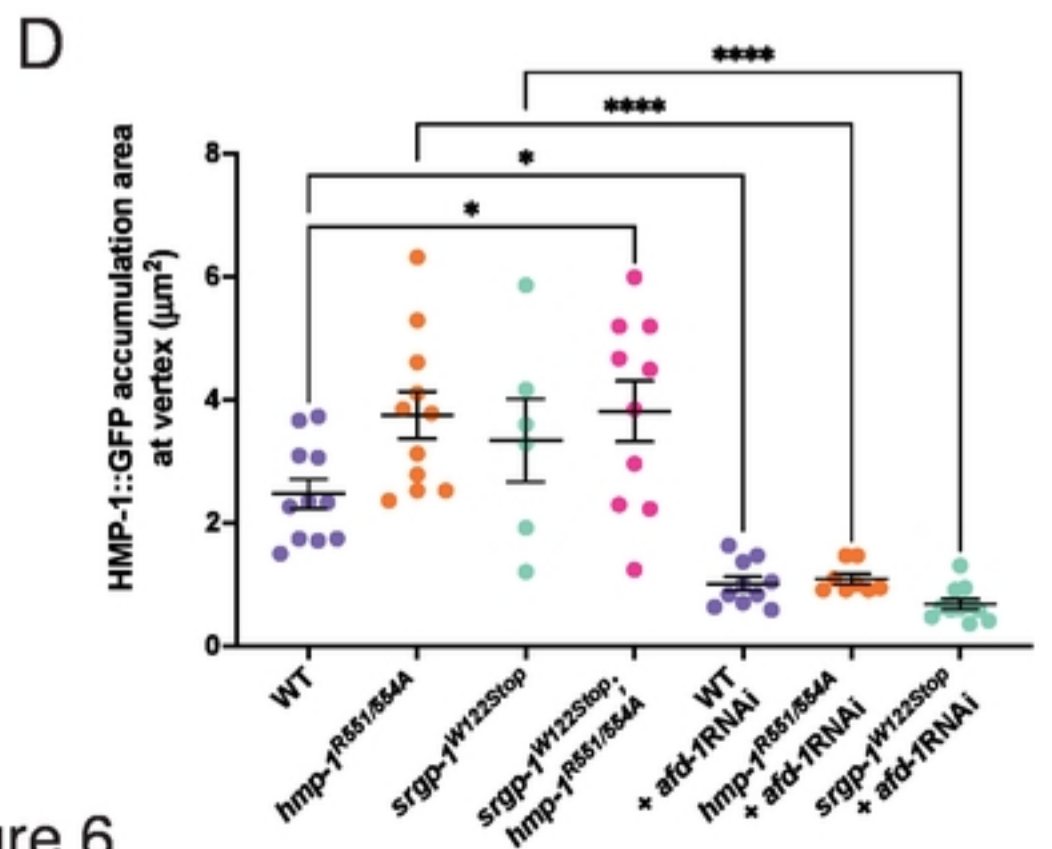

Figure 6

Figure 6



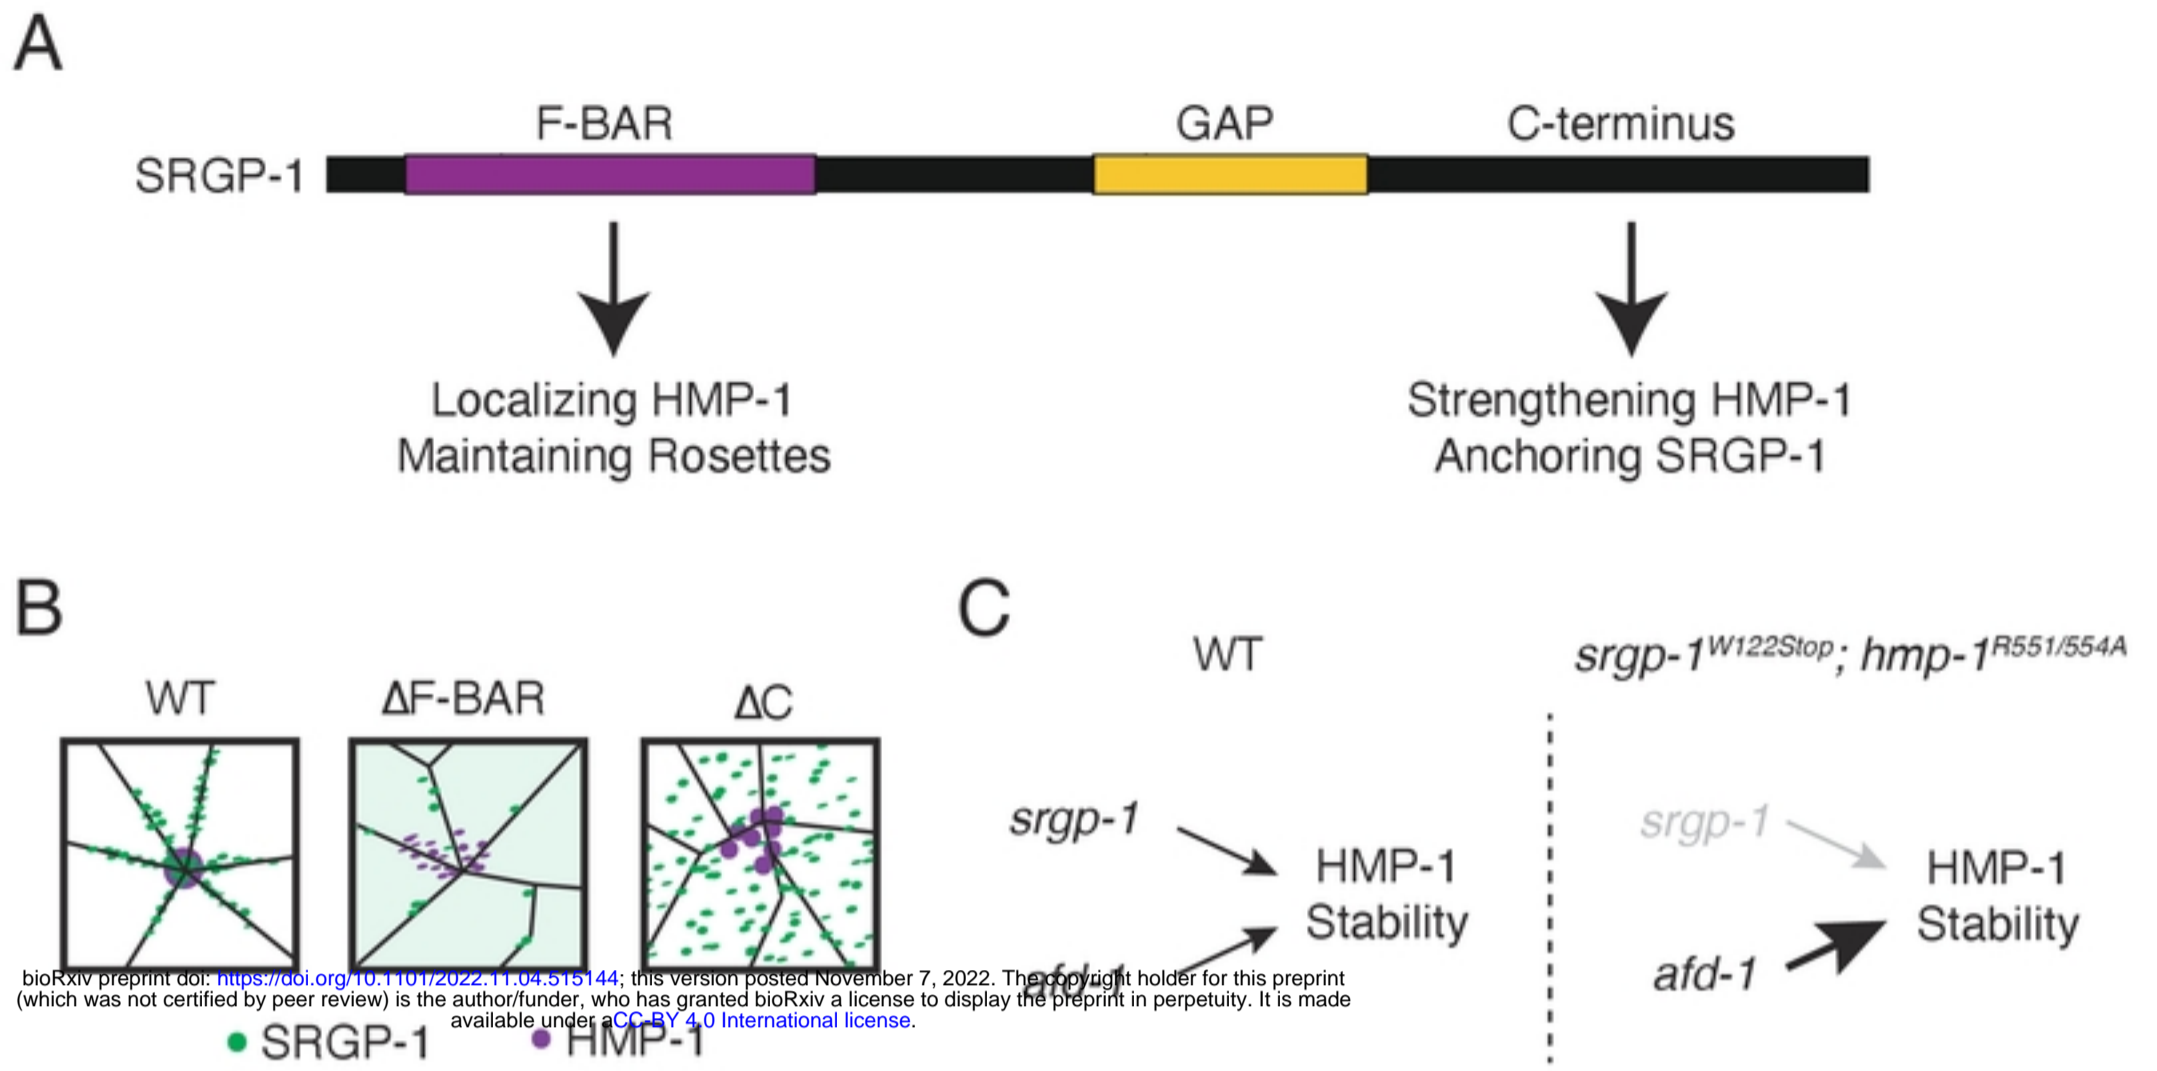

Figure 7
